# Supplementary material for: Barley yield and malt quality affected by fall and spring planting under rainfed conditions
Source: PeerJ. 2023 Aug 14;11:e15802. doi: 10.7717/peerj.15802 (PMC10434083; doi:10.7717/peerj.15802)
Supplement: Supplemental Information 2 [file peerj-11-15802-s002.xlsx]

## Sheet: Figure1
			Montly Mean Temperature (°C)			Montly Total Rainfall (mm)
			Long-Term Temperature	2015-2016 Temperature	2016-2017 Temperature	Long-Term Rainfall	2015-2016 Rainfall	2016-2017 Rainfall
		Nov	7.9	7.5	7.3	42.1	17	4.7
		Dec	3.6	-0.1	1.2	45.6	13	28.8
		Jan	1.8	1.7	0.4	42.5	72.6	53.6
		Feb	3.5	7.5	2.7	34	1.6	3.3
		Mar	7.3	9.6	8.2	42.7	46.4	27.5
		Apr	12.4	15.3	11.8	53.9	32.1	32.6
		May	16.3	16.5	15.4	59.5	99.5	56.6
		June	19.6	21.4	19.8	39.6	33.1	22.2
			9.05	9.925	8.35	359.9	315.3	229.3
			13.9	15.7	13.8	195.7	211.1	138.9

## Sheet: Figure2
	Environment	Cultivars	Replication	GY
Aydanhanım	2016F	1	1	66.3
Başgül	2016F	2	1	62.6
Bolayır	2016F	3	1	64.4
Çatalhöyük	2016F	4	1	60.4
Durusu	2016F	5	1	64.9
Efes-98	2016F	6	1	61.3
Erciyes	2016F	7	1	59.8
Harrington	2016F	8	1	62.1
Ince-04	2016F	9	1	67.3
Kalaycı-97	2016F	10	1	63.1
Özdemir-05	2016F	11	1	61.3
Sladoran	2016F	12	1	64.4
Tokak 157/37	2016F	13	1	65.6
Yıldız	2016F	14	1	63.8
Zeynelağa	2016F	15	1	64.2
Aydanhanım	2016F	1	2	67.8
Başgül	2016F	2	2	61.5
Bolayır	2016F	3	2	65
Çatalhöyük	2016F	4	2	60.2
Durusu	2016F	5	2	64.4
Efes-98	2016F	6	2	61.6
Erciyes	2016F	7	2	59.9
Harrington	2016F	8	2	63.1
Ince-04	2016F	9	2	66.8
Kalaycı-97	2016F	10	2	62.7
Özdemir-05	2016F	11	2	60.2
Sladoran	2016F	12	2	64
Tokak 157/37	2016F	13	2	62.8
Yıldız	2016F	14	2	64.6
Zeynelağa	2016F	15	2	65.2
Aydanhanım	2016F	1	3	66
Başgül	2016F	2	3	61.5
Bolayır	2016F	3	3	63.9
Çatalhöyük	2016F	4	3	59.5
Durusu	2016F	5	3	64.9
Efes-98	2016F	6	3	61.8
Erciyes	2016F	7	3	59.1
Harrington	2016F	8	3	63.3
Ince-04	2016F	9	3	66
Kalaycı-97	2016F	10	3	62.2
Özdemir-05	2016F	11	3	60.9
Sladoran	2016F	12	3	64.6
Tokak 157/37	2016F	13	3	64
Yıldız	2016F	14	3	64.9
Zeynelağa	2016F	15	3	66.6
Aydanhanım	2016F	1	4	66.7
Başgül	2016F	2	4	61.9
Bolayır	2016F	3	4	64.4
Çatalhöyük	2016F	4	4	60
Durusu	2016F	5	4	64.8
Efes-98	2016F	6	4	61.6
Erciyes	2016F	7	4	59.6
Harrington	2016F	8	4	62.8
Ince-04	2016F	9	4	66.7
Kalaycı-97	2016F	10	4	62.7
Özdemir-05	2016F	11	4	60.8
Sladoran	2016F	12	4	64.3
Tokak 157/37	2016F	13	4	62.6
Yıldız	2016F	14	4	64.5
Zeynelağa	2016F	15	4	65.3
Aydanhanım	2017F	1	1	62
Başgül	2017F	2	1	59
Bolayır	2017F	3	1	63
Çatalhöyük	2017F	4	1	57.7
Durusu	2017F	5	1	64.4
Efes-98	2017F	6	1	58.4
Erciyes	2017F	7	1	57.6
Harrington	2017F	8	1	60
Ince-04	2017F	9	1	62.2
Kalaycı-97	2017F	10	1	60.2
Özdemir-05	2017F	11	1	62.8
Sladoran	2017F	12	1	63.9
Tokak 157/37	2017F	13	1	58
Yıldız	2017F	14	1	68.2
Zeynelağa	2017F	15	1	67.7
Aydanhanım	2017F	1	2	63
Başgül	2017F	2	2	60.8
Bolayır	2017F	3	2	64.8
Çatalhöyük	2017F	4	2	57.1
Durusu	2017F	5	2	63.5
Efes-98	2017F	6	2	57.5
Erciyes	2017F	7	2	60.2
Harrington	2017F	8	2	61
Ince-04	2017F	9	2	63.7
Kalaycı-97	2017F	10	2	60.7
Özdemir-05	2017F	11	2	58.3
Sladoran	2017F	12	2	64
Tokak 157/37	2017F	13	2	59.1
Yıldız	2017F	14	2	66.6
Zeynelağa	2017F	15	2	67.2
Aydanhanım	2017F	1	3	64
Başgül	2017F	2	3	58.9
Bolayır	2017F	3	3	65.5
Çatalhöyük	2017F	4	3	58.3
Durusu	2017F	5	3	64.1
Efes-98	2017F	6	3	56
Erciyes	2017F	7	3	57.7
Harrington	2017F	8	3	60.5
Ince-04	2017F	9	3	63.4
Kalaycı-97	2017F	10	3	60
Özdemir-05	2017F	11	3	57.7
Sladoran	2017F	12	3	63.7
Tokak 157/37	2017F	13	3	59
Yıldız	2017F	14	3	66.1
Zeynelağa	2017F	15	3	67.1
Aydanhanım	2017F	1	4	63.9
Başgül	2017F	2	4	61.1
Bolayır	2017F	3	4	64.2
Çatalhöyük	2017F	4	4	57.9
Durusu	2017F	5	4	63.5
Efes-98	2017F	6	4	57.5
Erciyes	2017F	7	4	60.2
Harrington	2017F	8	4	61.5
Ince-04	2017F	9	4	64.3
Kalaycı-97	2017F	10	4	60.3
Özdemir-05	2017F	11	4	59.2
Sladoran	2017F	12	4	63.2
Tokak 157/37	2017F	13	4	58
Yıldız	2017F	14	4	65.4
Zeynelağa	2017F	15	4	67.3
Aydanhanım	2016S	1	1	62.1
Başgül	2016S	2	1	63.8
Bolayır	2016S	3	1	60.8
Çatalhöyük	2016S	4	1	62.5
Durusu	2016S	5	1	62.8
Efes-98	2016S	6	1	64
Erciyes	2016S	7	1	62.6
Harrington	2016S	8	1	63.5
Ince-04	2016S	9	1	66.7
Kalaycı-97	2016S	10	1	62.8
Özdemir-05	2016S	11	1	62.2
Sladoran	2016S	12	1	62.4
Tokak 157/37	2016S	13	1	62
Yıldız	2016S	14	1	61.5
Zeynelağa	2016S	15	1	64.3
Aydanhanım	2016S	1	2	61.8
Başgül	2016S	2	2	62.6
Bolayır	2016S	3	2	60.5
Çatalhöyük	2016S	4	2	61.6
Durusu	2016S	5	2	62.9
Efes-98	2016S	6	2	63
Erciyes	2016S	7	2	62.2
Harrington	2016S	8	2	62.7
Ince-04	2016S	9	2	66.4
Kalaycı-97	2016S	10	2	62.6
Özdemir-05	2016S	11	2	63.1
Sladoran	2016S	12	2	63.4
Tokak 157/37	2016S	13	2	64.4
Yıldız	2016S	14	2	60.3
Zeynelağa	2016S	15	2	63.7
Aydanhanım	2016S	1	3	61.9
Başgül	2016S	2	3	61.6
Bolayır	2016S	3	3	59.8
Çatalhöyük	2016S	4	3	61.1
Durusu	2016S	5	3	63.3
Efes-98	2016S	6	3	61.9
Erciyes	2016S	7	3	62.1
Harrington	2016S	8	3	62.7
Ince-04	2016S	9	3	65.2
Kalaycı-97	2016S	10	3	62.3
Özdemir-05	2016S	11	3	61.8
Sladoran	2016S	12	3	63.7
Tokak 157/37	2016S	13	3	62.6
Yıldız	2016S	14	3	59.7
Zeynelağa	2016S	15	3	62.4
Aydanhanım	2016S	1	4	61.9
Başgül	2016S	2	4	62.7
Bolayır	2016S	3	4	60.4
Çatalhöyük	2016S	4	4	61.7
Durusu	2016S	5	4	63
Efes-98	2016S	6	4	63
Erciyes	2016S	7	4	62.3
Harrington	2016S	8	4	63
Ince-04	2016S	9	4	66.1
Kalaycı-97	2016S	10	4	62.6
Özdemir-05	2016S	11	4	62.4
Sladoran	2016S	12	4	63.2
Tokak 157/37	2016S	13	4	63
Yıldız	2016S	14	4	60.5
Zeynelağa	2016S	15	4	63.5
Aydanhanım	2017S	1	1	55
Başgül	2017S	2	1	66.2
Bolayır	2017S	3	1	61.3
Çatalhöyük	2017S	4	1	63.1
Durusu	2017S	5	1	63.4
Efes-98	2017S	6	1	65.5
Erciyes	2017S	7	1	67
Harrington	2017S	8	1	65.1
Ince-04	2017S	9	1	65.1
Kalaycı-97	2017S	10	1	62.9
Özdemir-05	2017S	11	1	63
Sladoran	2017S	12	1	62.1
Tokak 157/37	2017S	13	1	62.3
Yıldız	2017S	14	1	60.4
Zeynelağa	2017S	15	1	68.4
Aydanhanım	2017S	1	2	56.6
Başgül	2017S	2	2	66.1
Bolayır	2017S	3	2	61.6
Çatalhöyük	2017S	4	2	62.2
Durusu	2017S	5	2	63.6
Efes-98	2017S	6	2	60.5
Erciyes	2017S	7	2	60.6
Harrington	2017S	8	2	61.4
Ince-04	2017S	9	2	64.8
Kalaycı-97	2017S	10	2	63.3
Özdemir-05	2017S	11	2	62.1
Sladoran	2017S	12	2	61.8
Tokak 157/37	2017S	13	2	63
Yıldız	2017S	14	2	60.4
Zeynelağa	2017S	15	2	66.6
Aydanhanım	2017S	1	3	55.2
Başgül	2017S	2	3	66
Bolayır	2017S	3	3	60.2
Çatalhöyük	2017S	4	3	62.1
Durusu	2017S	5	3	62.6
Efes-98	2017S	6	3	61.4
Erciyes	2017S	7	3	62.3
Harrington	2017S	8	3	68.6
Ince-04	2017S	9	3	65.7
Kalaycı-97	2017S	10	3	68.6
Özdemir-05	2017S	11	3	65.1
Sladoran	2017S	12	3	62.2
Tokak 157/37	2017S	13	3	63.1
Yıldız	2017S	14	3	61
Zeynelağa	2017S	15	3	65.7
Aydanhanım	2017S	1	4	56
Başgül	2017S	2	4	61.1
Bolayır	2017S	3	4	62.1
Çatalhöyük	2017S	4	4	61.1
Durusu	2017S	5	4	62.8
Efes-98	2017S	6	4	61.7
Erciyes	2017S	7	4	65.5
Harrington	2017S	8	4	58.2
Ince-04	2017S	9	4	65.5
Kalaycı-97	2017S	10	4	62.4
Özdemir-05	2017S	11	4	64
Sladoran	2017S	12	4	61
Tokak 157/37	2017S	13	4	61.4
Yıldız	2017S	14	4	61.6
Zeynelağa	2017S	15	4	67

## Sheet: Figure3
	Environment	Cultivars	Replication	ME
Aydanhanım	2016F	1	1	80
Başgül	2016F	2	1	77.2
Bolayır	2016F	3	1	79.1
Çatalhöyük	2016F	4	1	78.5
Durusu	2016F	5	1	80.7
Efes-98	2016F	6	1	71.4
Erciyes	2016F	7	1	77.1
Harrington	2016F	8	1	82.4
Ince-04	2016F	9	1	81
Kalaycı-97	2016F	10	1	75.7
Özdemir-05	2016F	11	1	76.4
Sladoran	2016F	12	1	78.3
Tokak 157/37	2016F	13	1	74.2
Yıldız	2016F	14	1	81.7
Zeynelağa	2016F	15	1	79.6
Aydanhanım	2016F	1	2	79.1
Başgül	2016F	2	2	76.7
Bolayır	2016F	3	2	80.6
Çatalhöyük	2016F	4	2	78.1
Durusu	2016F	5	2	81.3
Efes-98	2016F	6	2	71.6
Erciyes	2016F	7	2	78
Harrington	2016F	8	2	82
Ince-04	2016F	9	2	80.8
Kalaycı-97	2016F	10	2	73.3
Özdemir-05	2016F	11	2	73.3
Sladoran	2016F	12	2	78.3
Tokak 157/37	2016F	13	2	74.3
Yıldız	2016F	14	2	81.4
Zeynelağa	2016F	15	2	78.6
Aydanhanım	2016F	1	3	80.4
Başgül	2016F	2	3	77.6
Bolayır	2016F	3	3	80.4
Çatalhöyük	2016F	4	3	77.7
Durusu	2016F	5	3	80.1
Efes-98	2016F	6	3	73.6
Erciyes	2016F	7	3	76.9
Harrington	2016F	8	3	81.6
Ince-04	2016F	9	3	81.3
Kalaycı-97	2016F	10	3	74
Özdemir-05	2016F	11	3	75.1
Sladoran	2016F	12	3	78.6
Tokak 157/37	2016F	13	3	75.9
Yıldız	2016F	14	3	82
Zeynelağa	2016F	15	3	78.8
Aydanhanım	2016F	1	4	79.8
Başgül	2016F	2	4	77.2
Bolayır	2016F	3	4	80.9
Çatalhöyük	2016F	4	4	78.1
Durusu	2016F	5	4	80.7
Efes-98	2016F	6	4	72.2
Erciyes	2016F	7	4	77.3
Harrington	2016F	8	4	82.9
Ince-04	2016F	9	4	82.2
Kalaycı-97	2016F	10	4	74.4
Özdemir-05	2016F	11	4	74.9
Sladoran	2016F	12	4	78.4
Tokak 157/37	2016F	13	4	74.1
Yıldız	2016F	14	4	81.7
Zeynelağa	2016F	15	4	79
Aydanhanım	2017F	1	1	79.4
Başgül	2017F	2	1	75.3
Bolayır	2017F	3	1	79
Çatalhöyük	2017F	4	1	71.1
Durusu	2017F	5	1	80.1
Efes-98	2017F	6	1	75.2
Erciyes	2017F	7	1	70.1
Harrington	2017F	8	1	82.1
Ince-04	2017F	9	1	80.5
Kalaycı-97	2017F	10	1	72.3
Özdemir-05	2017F	11	1	71.7
Sladoran	2017F	12	1	78.5
Tokak 157/37	2017F	13	1	75.6
Yıldız	2017F	14	1	79.5
Zeynelağa	2017F	15	1	77.1
Aydanhanım	2017F	1	2	79.4
Başgül	2017F	2	2	75.8
Bolayır	2017F	3	2	79.5
Çatalhöyük	2017F	4	2	72.2
Durusu	2017F	5	2	80.2
Efes-98	2017F	6	2	76
Erciyes	2017F	7	2	69.3
Harrington	2017F	8	2	81.6
Ince-04	2017F	9	2	80.2
Kalaycı-97	2017F	10	2	72.4
Özdemir-05	2017F	11	2	71.6
Sladoran	2017F	12	2	79
Tokak 157/37	2017F	13	2	75
Yıldız	2017F	14	2	79.2
Zeynelağa	2017F	15	2	79.5
Aydanhanım	2017F	1	3	80.9
Başgül	2017F	2	3	75.2
Bolayır	2017F	3	3	80
Çatalhöyük	2017F	4	3	71.5
Durusu	2017F	5	3	80.6
Efes-98	2017F	6	3	77.3
Erciyes	2017F	7	3	71.1
Harrington	2017F	8	3	82
Ince-04	2017F	9	3	79.1
Kalaycı-97	2017F	10	3	73.8
Özdemir-05	2017F	11	3	71.9
Sladoran	2017F	12	3	77.1
Tokak 157/37	2017F	13	3	75.6
Yıldız	2017F	14	3	80.7
Zeynelağa	2017F	15	3	80.2
Aydanhanım	2017F	1	4	80.8
Başgül	2017F	2	4	75.6
Bolayır	2017F	3	4	80.8
Çatalhöyük	2017F	4	4	71.8
Durusu	2017F	5	4	81.3
Efes-98	2017F	6	4	77.6
Erciyes	2017F	7	4	71.3
Harrington	2017F	8	4	81.6
Ince-04	2017F	9	4	80.3
Kalaycı-97	2017F	10	4	74.3
Özdemir-05	2017F	11	4	71.7
Sladoran	2017F	12	4	79
Tokak 157/37	2017F	13	4	75.2
Yıldız	2017F	14	4	78.8
Zeynelağa	2017F	15	4	80
Aydanhanım	2016S	1	1	73
Başgül	2016S	2	1	75.9
Bolayır	2016S	3	1	80.1
Çatalhöyük	2016S	4	1	73.7
Durusu	2016S	5	1	77.9
Efes-98	2016S	6	1	74.5
Erciyes	2016S	7	1	73.3
Harrington	2016S	8	1	81.6
Ince-04	2016S	9	1	82.3
Kalaycı-97	2016S	10	1	72.5
Özdemir-05	2016S	11	1	76
Sladoran	2016S	12	1	78.8
Tokak 157/37	2016S	13	1	73.5
Yıldız	2016S	14	1	81
Zeynelağa	2016S	15	1	77
Aydanhanım	2016S	1	2	74.2
Başgül	2016S	2	2	74.7
Bolayır	2016S	3	2	79.9
Çatalhöyük	2016S	4	2	74.9
Durusu	2016S	5	2	78.4
Efes-98	2016S	6	2	74.3
Erciyes	2016S	7	2	75.6
Harrington	2016S	8	2	82
Ince-04	2016S	9	2	81.8
Kalaycı-97	2016S	10	2	71.7
Özdemir-05	2016S	11	2	74
Sladoran	2016S	12	2	78.8
Tokak 157/37	2016S	13	2	74.1
Yıldız	2016S	14	2	79.9
Zeynelağa	2016S	15	2	77.7
Aydanhanım	2016S	1	3	78.6
Başgül	2016S	2	3	75.7
Bolayır	2016S	3	3	79.2
Çatalhöyük	2016S	4	3	74.4
Durusu	2016S	5	3	79.7
Efes-98	2016S	6	3	75.6
Erciyes	2016S	7	3	74
Harrington	2016S	8	3	82
Ince-04	2016S	9	3	81
Kalaycı-97	2016S	10	3	72.9
Özdemir-05	2016S	11	3	75.2
Sladoran	2016S	12	3	79.4
Tokak 157/37	2016S	13	3	73
Yıldız	2016S	14	3	81
Zeynelağa	2016S	15	3	76.4
Aydanhanım	2016S	1	4	75.3
Başgül	2016S	2	4	75.4
Bolayır	2016S	3	4	79.7
Çatalhöyük	2016S	4	4	74.3
Durusu	2016S	5	4	78.7
Efes-98	2016S	6	4	74.8
Erciyes	2016S	7	4	74.3
Harrington	2016S	8	4	81.9
Ince-04	2016S	9	4	81.7
Kalaycı-97	2016S	10	4	72.4
Özdemir-05	2016S	11	4	75.1
Sladoran	2016S	12	4	79
Tokak 157/37	2016S	13	4	73.5
Yıldız	2016S	14	4	80.7
Zeynelağa	2016S	15	4	77
Aydanhanım	2017S	1	1	73.9
Başgül	2017S	2	1	72.8
Bolayır	2017S	3	1	73
Çatalhöyük	2017S	4	1	72.4
Durusu	2017S	5	1	75.6
Efes-98	2017S	6	1	73
Erciyes	2017S	7	1	69.4
Harrington	2017S	8	1	81.6
Ince-04	2017S	9	1	80.2
Kalaycı-97	2017S	10	1	67.5
Özdemir-05	2017S	11	1	69.9
Sladoran	2017S	12	1	74
Tokak 157/37	2017S	13	1	74.8
Yıldız	2017S	14	1	75
Zeynelağa	2017S	15	1	74.4
Aydanhanım	2017S	1	2	75.8
Başgül	2017S	2	2	73
Bolayır	2017S	3	2	74.6
Çatalhöyük	2017S	4	2	73
Durusu	2017S	5	2	74.9
Efes-98	2017S	6	2	71.8
Erciyes	2017S	7	2	69.4
Harrington	2017S	8	2	80.7
Ince-04	2017S	9	2	80
Kalaycı-97	2017S	10	2	68.4
Özdemir-05	2017S	11	2	71
Sladoran	2017S	12	2	74.2
Tokak 157/37	2017S	13	2	73.9
Yıldız	2017S	14	2	75.2
Zeynelağa	2017S	15	2	76.9
Aydanhanım	2017S	1	3	73.5
Başgül	2017S	2	3	72.2
Bolayır	2017S	3	3	73.9
Çatalhöyük	2017S	4	3	71.7
Durusu	2017S	5	3	74.4
Efes-98	2017S	6	3	72.6
Erciyes	2017S	7	3	70.1
Harrington	2017S	8	3	80.1
Ince-04	2017S	9	3	78
Kalaycı-97	2017S	10	3	69.8
Özdemir-05	2017S	11	3	71
Sladoran	2017S	12	3	72.9
Tokak 157/37	2017S	13	3	75.2
Yıldız	2017S	14	3	75.2
Zeynelağa	2017S	15	3	74.7
Aydanhanım	2017S	1	4	75.4
Başgül	2017S	2	4	73.1
Bolayır	2017S	3	4	75.5
Çatalhöyük	2017S	4	4	72
Durusu	2017S	5	4	76
Efes-98	2017S	6	4	72
Erciyes	2017S	7	4	68.8
Harrington	2017S	8	4	80.3
Ince-04	2017S	9	4	78.4
Kalaycı-97	2017S	10	4	66.7
Özdemir-05	2017S	11	4	69.4
Sladoran	2017S	12	4	73.6
Tokak 157/37	2017S	13	4	75.2
Yıldız	2017S	14	4	74.1
Zeynelağa	2017S	15	4	75.8

## Sheet: Figure4a
Fall	Grain yield (t/ha)	Malt Extract (%)
Aydanhanım	5.945	79.975
Başgül	4.55875	76.325
Bolayır	4.875	80.0375
Çatalhöyük	4.25625	74.875
Çumra-2001	5.54125	77.3875
Durusu	6.07625	80.625
Efes-98	4.3125	74.3625
Erciyes	4.31875	73.8875
Harrington	5.21	82.025
Ince-04	5.7625	80.675
Kalaycı-97	5.105	73.775
Özdemir-05	4.435	73.325
Sladoran	5.11375	78.4
Tokak 157/37	4.1525	74.9875
Yıldız	5.4675	80.625
Zeynelağa	5.56625	79.1

## Sheet: Figure4b
Spring	Grain yield (t/ha)	Malt Extract (%)
Aydanhanım	3.6575	74.9625
Başgül	4.0675	74.1
Bolayır	4.36125	76.9875
Çatalhöyük	3.64	73.3
Durusu	4.6525	76.95
Efes-98	3.0175	73.575
Erciyes	4.3025	71.8625
Harrington	4.37125	81.275
Ince-04	4.80375	80.425
Kalaycı-97	3.7125	70.2375
Özdemir-05	4.0175	72.7
Sladoran	3.61625	76.3375
Tokak 157/37	3.8	74.15
Yıldız	3.35375	77.7625
Zeynelağa	4.66375	76.2375
