# Supplementary material for: Barley yield and malt quality affected by fall and spring planting under rainfed conditions
Source: PeerJ. 2023 Aug 14;11:e15802. doi: 10.7717/peerj.15802 (PMC10434083; doi:10.7717/peerj.15802)
Supplement: Supplemental Information 3 [file peerj-11-15802-s003.xlsx]

## Sheet: Data_for_Fall_trials
		HT	MAT	PH	LOD	NGPS	NSPS	TSW	HW	GY	AA	DP	ME
	Aydanhanim	179.13	108.13	221.25	44	30.4	402.6	5.95	48.46	64.96	108.9	392.51	79.98
	Basgul	170.75	104.13	208.63	95.38	24.15	426.21	4.56	44.94	60.91	47.06	118.49	76.33
	Bolayir	165.88	89.63	213.63	21.25	23.78	479.13	4.88	43.56	64.4	89.03	380.09	80.04
	Catalhoyuk	172.38	103.25	207.75	100	24.23	420.94	4.26	41.76	58.89	46.79	138.7	74.88
	Cumra-2001	175.38	104.88	221.88	22.88	30.16	373.36	5.54	49.4	64.58	51.9	272.78	77.39
	Durusu	172.13	93	220.25	21.25	25.63	466.23	6.08	51.43	64.31	95.59	339.84	80.63
	Efes-98	171.75	104.38	207.25	100	23.68	411.09	4.31	43.7	59.46	52.64	111.49	74.36
	Erciyes	171.25	99.88	208.75	100	24.41	424.51	4.32	41.78	59.26	44.38	132.74	73.89
	Harrington	172.25	86.5	213.5	28.75	26.45	506.81	5.21	38.68	61.79	115.75	458.5	82.03
	Ince-04	171.5	100.25	214.25	36.5	24.04	516.21	5.76	46.79	65.05	67.05	295.71	80.68
	Kalayci-97	171.38	96.63	211.88	87.13	23.61	499.63	5.11	43.74	61.49	61.66	127.65	73.78
	Ozdemir-05	170.38	95.88	209.13	98.75	22.45	511.25	4.44	38.59	60.15	55.33	156.49	73.33
	Sladoran	167	77.88	218.13	24.38	24.48	474.35	5.11	44.14	64.01	125.11	307.81	78.4
	Tokak 157/37	171	103.5	213.14	99.38	22.73	384.29	4.15	48.31	61.14	47.95	145.99	74.99
	Yildiz	167.88	95.5	217.78	12.5	26.04	431.83	5.47	49.05	65.51	182.99	303.49	80.63
	Zeynelaga	164.63	89.38	209.88	21.25	22.95	509.04	5.57	47.81	66.33	82.01	362.74	79.1

## Sheet: PCA_HID
	-1.16836	2.09789	-1.1528	0.24489	-0.377097	0.819336	0.306539	1.06479	1.86959	0.910905	-0.215556	1.07964	0.0483479	1.6	-0.857152	0.333007	0.130001	0.181182	-0.223889	0.0353518	0.0611129	0.0222648	0.0799517	-0.00983644
	0.957035	0.318878	0.500972	0.144809	-0.920024	0.166649	0.0243147	-0.884792	-0.998006	2.3689	-1.72726	-0.492584	0.748954	1.52342	0.187974	0.391453	-0.530187	0.294307	0.184148	0.173551	-0.0992028	-0.0848436	-0.025475	0.00487254
	-0.537541	-1.1797	0.183069	-0.405519	-1.01337	-1.50695	0.283927	1.40951	-0.644285	-0.854201	-1.16388	1.20503	-1.54247	0.769629	-0.000213589	-0.2081	0.610214	-0.109379	-0.187301	0.253892	-0.136654	-0.025201	-0.0405193	0.00910288
	1.31031	0.309235	-0.515723	-0.362998	-0.703853	-0.0490229	-0.154652	-0.745146	-0.206792	-0.610839	0.657646	0.394945	1.80699	0.296169	-0.0755187	0.0742669	0.0419939	0.270798	-0.151616	0.0877039	0.165632	0.130886	-0.0722377	0.00724834
	-0.719044	2.02597	0.121718	-0.0055025	0.896673	-2.04885	1.45091	-0.277829	-1.15345	-0.595651	0.398056	-1.05634	-1.05749	1.32364	-0.647095	-0.224285	0.0576374	-0.168052	0.340724	-0.165682	-0.00788986	0.0444872	-0.0524289	-0.0229504
	-1.20593	0.301632	0.605324	0.805356	0.932361	0.21513	-2.25557	-1.41866	0.0524764	-1.43188	-1.02406	0.692675	-0.357462	-1.5198	-0.420935	0.878123	0.203871	0.28577	0.0300002	0.0657759	-0.0571487	-0.0236097	-0.0279293	-0.0290452
	1.30946	0.372097	0.201703	-0.401889	-0.716011	0.377826	0.00627642	-0.918619	0.298984	-0.714372	2.14537	0.640213	-1.68955	0.257816	-0.013	0.663757	0.198549	0.23974	0.0679858	-0.228795	0.0489268	-0.010806	-0.0122241	0.0381148
	1.27316	0.153841	-0.344704	-0.458795	0.146136	-0.434261	0.373371	-0.865616	0.303386	-0.0943097	-1.17569	1.48484	-1.03496	0.89072	1.23877	0.174067	0.0339777	0.0862492	-0.238165	-0.117739	0.0985846	-0.0236894	-0.0125705	-0.0277663
	-0.729063	-0.925555	-2.75209	-0.406294	-0.926446	-0.3171	-0.903287	-0.546206	0.0410028	-0.0715183	0.0792749	-1.82005	-1.71794	-0.0764443	0.551697	0.28104	-0.0462941	-0.0645461	0.314774	0.22966	0.057109	0.12721	0.0409552	-4.12096e-05
	-0.604863	-0.237533	0.187221	2.24535	-0.684204	0.539301	-0.444088	0.759227	-1.86131	0.739219	1.41732	0.641858	-1.41753	-0.415618	-0.120206	-0.848465	-0.0333153	0.771273	0.0627069	0.0262799	0.0476151	-0.0189934	0.00821129	-0.0029795
	0.683002	-0.281069	-0.0295283	1.07546	1.8837	1.13317	0.623544	-0.213465	0.210304	-0.0449335	-0.466046	-1.20858	-1.67934	-0.325623	-0.513117	0.0282428	-0.362953	-0.304383	-0.102798	0.133498	0.26366	-0.0808443	-0.025015	0.0020406
	1.20264	-0.881674	-0.907763	0.588419	1.09039	0.564448	0.760006	1.6679	0.00613379	-0.91918	-0.378826	0.106264	-1.70395	-0.223151	-0.221735	0.0344109	-0.60115	-0.00163328	-0.325358	-0.057117	-0.191066	0.094623	-0.014171	0.00122677
	-0.752203	-1.22337	0.0293139	-1.53718	2.01919	-0.603682	-0.369501	-0.121834	0.0425331	1.88367	1.2016	0.901451
	0.958968	0.654312	1.48595	-0.72655	-0.177047	-0.485646	-1.94801	1.86848	0.756948	0.0991035	0.179249	-1.46226
	-1.26734	-0.109979	0.984752	-1.92985	-0.55536	2.31981	0.990516	0.0281074	-0.880023	-0.753134	-0.224948	-0.472219
	-0.710233	-1.39498	1.40259	1.1303	-0.895029	-0.690164	1.2557	-0.805853	2.16251	0.0882311	0.29774	-0.634875

## Sheet: Fall_PCA
	XLSTAT 2016.02.27444 - Principal Component Analysis (PCA) - Start time: 2.06.2023 at 15:15:38
	Observations/variables table: Workbook = Kitap1 / Sheet = Fall / Range = Fall!$B:$M / 16 rows and 12 columns
	Observation labels: Workbook = Kitap1 / Sheet = Fall / Range = Fall!$A:$A / 16 rows and 1 column
	PCA type: Pearson (n)
	Type of biplot: Correlation biplot / Coefficient = Automatic
	Summary statistics:
	Variable	Observations	Obs. with missing data	Obs. without missing data	Minimum	Maximum	Mean	Std. deviation
	HT	16	0	16	164.63	179.13	170.917	3.50149
	MAT	16	0	16	77.88	108.13	97.05	8.1619
	PH	16	0	16	207.25	221.88	213.567	4.963
	LOD	16	0	16	12.5	100	57.0875	37.3246
	NGPS	16	0	16	22.45	30.4	24.9494	2.35516
	NSPS	16	0	16	373.36	516.21	452.342	48.4914
	TSW	16	0	16	4.15	6.08	5.045	0.645497
	HW	16	0	16	38.59	51.43	45.1337	3.8196
	GY	16	0	16	58.89	66.33	62.64	2.49877
	AA	16	0	16	44.38	182.99	79.6338	38.485
	DP	16	0	16	111.49	458.5	252.814	117.564
	ME	16	0	16	73.33	82.03	77.5275	2.99835
	Correlation matrix (Pearson (n)):
	Variables	HT	MAT	PH	LOD	NGPS	NSPS	TSW	HW	GY	AA	DP	ME
	HT	1	0.676802	0.336925	0.212928	0.692692	-0.49089	0.173402	0.126496	-0.186132	-0.223754	-0.0611603	-0.0728003
	MAT	0.676802	1	-0.11184	0.522334	0.274797	-0.65834	-0.193361	0.232484	-0.313522	-0.509161	-0.49741	-0.393389
	PH	0.336925	-0.11184	1	-0.724766	0.751816	-0.195313	0.762814	0.641758	0.709687	0.547499	0.615373	0.611843
	LOD	0.212928	0.522334	-0.724766	1	-0.451104	-0.262127	-0.816996	-0.460964	-0.901079	-0.719777	-0.888018	-0.887961
	NGPS	0.692692	0.274797	0.751816	-0.451104	1	-0.45277	0.573504	0.385849	0.390913	0.312767	0.465728	0.429848
	NSPS	-0.49089	-0.65834	-0.195313	-0.262127	-0.45277	1	0.253746	-0.380588	0.208563	0.187149	0.331889	0.268285
	TSW	0.173402	-0.193361	0.762814	-0.816996	0.573504	0.253746	1	0.602324	0.854406	0.541252	0.741636	0.769412
	HW	0.126496	0.232484	0.641758	-0.460964	0.385849	-0.380588	0.602324	1	0.663456	0.242281	0.231732	0.380362
	GY	-0.186132	-0.313522	0.709687	-0.901079	0.390913	0.208563	0.854406	0.663456	1	0.608109	0.759497	0.779777
	AA	-0.223754	-0.509161	0.547499	-0.719777	0.312767	0.187149	0.541252	0.242281	0.608109	1	0.665339	0.707846
	DP	-0.0611603	-0.49741	0.615373	-0.888018	0.465728	0.331889	0.741636	0.231732	0.759497	0.665339	1	0.919314
	ME	-0.0728003	-0.393389	0.611843	-0.887961	0.429848	0.268285	0.769412	0.380362	0.779777	0.707846	0.919314	1
	Principal Component Analysis:
	Eigenvalues:
		F1	F2	F3	F4	F5	F6	F7	F8	F9	F10	F11	F12
	Eigenvalue	6.26855	3.0732	1.00508	0.683592	0.356261	0.30435	0.153386	0.0784223	0.0530367	0.0172476	0.00576997	0.00109794
	Variability (%)	52.238	25.61	8.3757	5.6966	2.96884	2.53625	1.27822	0.653519	0.441973	0.14373	0.0480831	0.00914952
	Cumulative %	52.238	77.8479	86.2236	91.9202	94.8891	97.4253	98.7035	99.3571	99.799	99.9428	99.9909	100
	Eigenvectors:
		F1	F2	F3	F4	F5	F6	F7	F8	F9	F10	F11	F12
	HT	0.0102929	0.486483	-0.455722	0.214683	0.116093	0.175054	-0.304707	0.0672877	0.141445	0.0903647	0.561027	-0.158231
	MAT	0.159446	0.463199	0.09994	0.252362	-0.473466	0.284353	0.250621	0.330332	-0.229604	-0.344348	-0.17876	0.0783807
	PH	-0.328381	0.234007	-0.000113559	-0.134158	0.54493	-0.105679	-0.254912	0.48325	-0.316283	-0.102282	-0.284327	0.146431
	LOD	0.384694	0.0900507	-0.040151	0.0478785	0.0375012	0.261639	-0.206345	0.166933	0.383353	0.531216	-0.506897	0.116598
	NGPS	-0.225131	0.402456	-0.344041	-0.144592	0.0514711	-0.162368	0.463717	-0.315354	-0.018261	0.180557	-0.367898	-0.369185
	NSPS	-0.0761007	-0.462099	-0.223799	0.566109	0.18206	0.276105	0.0408294	0.125196	-0.13227	-0.0958232	-0.195982	-0.467227
	TSW	-0.359691	0.0783894	-0.00691171	0.427911	0.177308	0.231632	0.0925269	-0.435482	0.11324	-0.0438574	-0.0857773	0.613123
	HW	-0.220335	0.270825	0.658616	0.112218	0.0303426	0.083332	-0.324137	-0.2241	0.228173	-0.0961464	-0.0882085	-0.446654
	GY	-0.365735	-0.023243	0.29332	0.181181	-0.0413414	-0.062363	0.4284	0.437129	0.132178	0.5163	0.287386	-0.000662905
	AA	-0.30178	-0.12637	-0.0639101	-0.546989	-0.0297511	0.745186	0.0853425	0.0500204	0.110205	-0.0770873	0.0576192	-0.0479289
	DP	-0.357519	-0.0990064	-0.272809	0.0182076	-0.324123	-0.294087	-0.139906	0.254096	0.610238	-0.328117	-0.175532	0.0328255
	ME	-0.362758	-0.0678494	-0.11789	0.0221841	-0.536836	-0.00157803	-0.442804	-0.108715	-0.442221	0.38404	-0.0994393	0.0197341
	Factor loadings:
		F1	F2	F3	F4	F5	F6	F7	F8	F9	F10	F11	F12
	HT	0.0257704	0.852831	-0.456879	0.177499	0.0692932	0.0965736	-0.119337	0.0188432	0.0325744	0.0118676	0.0426158	-0.00524301
	MAT	0.399207	0.812012	0.100194	0.208652	-0.2826	0.156871	0.0981546	0.0925062	-0.052877	-0.0452233	-0.0135787	0.00259716
	PH	-0.822169	0.410227	-0.000113847	-0.110921	0.325256	-0.0583009	-0.099835	0.135329	-0.072839	-0.0134326	-0.0215976	0.00485201
	LOD	0.963162	0.157864	-0.040253	0.0395857	0.0223836	0.144341	-0.0808141	0.0467479	0.088285	0.0697646	-0.0385041	0.00386351
	NGPS	-0.563661	0.705527	-0.344914	-0.119548	0.0307219	-0.0895752	0.181613	-0.0883117	-0.00420545	0.0237125	-0.0279456	-0.012233
	NSPS	-0.190534	-0.810084	-0.224367	0.468057	0.108667	0.152321	0.0159907	0.0350598	-0.0304614	-0.0125845	-0.0148869	-0.0154817
	TSW	-0.900562	0.137421	-0.00692925	0.353795	0.105831	0.127786	0.0362378	-0.121952	0.0260789	-0.00575979	-0.00651567	0.020316
	HW	-0.551655	0.474772	0.660288	0.0927812	0.0181108	0.0459725	-0.126947	-0.062757	0.0525475	-0.0126269	-0.00670035	-0.0148
	GY	-0.915695	-0.0407463	0.294065	0.1498	-0.0246757	-0.0344043	0.167781	0.122413	0.0304402	0.0678057	0.0218299	-2.19655e-05
	AA	-0.75557	-0.221533	-0.0640724	-0.452248	-0.0177577	0.411104	0.033424	0.0140077	0.0253798	-0.0101239	0.00437678	-0.00158813
	DP	-0.895123	-0.173563	-0.273502	0.0150539	-0.193461	-0.162242	-0.0547935	0.0711571	0.140536	-0.0430916	-0.0133335	0.00108768
	ME	-0.90824	-0.118944	-0.118189	0.0183417	-0.320425	-0.000870568	-0.173422	-0.0304445	-0.101842	0.0504359	-0.00755344	0.000653893
	Correlations between variables and factors:
		F1	F2	F3	F4	F5	F6	F7	F8	F9	F10	F11	F12
	HT	0.0257704	0.852831	-0.456879	0.177499	0.0692932	0.0965736	-0.119337	0.0188432	0.0325744	0.0118676	0.0426158	-0.00524301
	MAT	0.399207	0.812012	0.100194	0.208652	-0.2826	0.156871	0.0981546	0.0925062	-0.052877	-0.0452233	-0.0135787	0.00259716
	PH	-0.822169	0.410227	-0.000113847	-0.110921	0.325256	-0.0583009	-0.099835	0.135329	-0.072839	-0.0134326	-0.0215976	0.00485201
	LOD	0.963162	0.157864	-0.040253	0.0395857	0.0223836	0.144341	-0.0808141	0.0467479	0.088285	0.0697646	-0.0385041	0.00386351
	NGPS	-0.563661	0.705527	-0.344914	-0.119548	0.0307219	-0.0895752	0.181613	-0.0883117	-0.00420545	0.0237125	-0.0279456	-0.012233
	NSPS	-0.190534	-0.810084	-0.224367	0.468057	0.108667	0.152321	0.0159907	0.0350598	-0.0304614	-0.0125845	-0.0148869	-0.0154817
	TSW	-0.900562	0.137421	-0.00692925	0.353795	0.105831	0.127786	0.0362378	-0.121952	0.0260789	-0.00575979	-0.00651567	0.020316
	HW	-0.551655	0.474772	0.660288	0.0927812	0.0181108	0.0459725	-0.126947	-0.062757	0.0525475	-0.0126269	-0.00670035	-0.0148
	GY	-0.915695	-0.0407463	0.294065	0.1498	-0.0246757	-0.0344043	0.167781	0.122413	0.0304402	0.0678057	0.0218299	-2.19655e-05
	AA	-0.75557	-0.221533	-0.0640724	-0.452248	-0.0177577	0.411104	0.033424	0.0140077	0.0253798	-0.0101239	0.00437678	-0.00158813
	DP	-0.895123	-0.173563	-0.273502	0.0150539	-0.193461	-0.162242	-0.0547935	0.0711571	0.140536	-0.0430916	-0.0133335	0.00108768
	ME	-0.90824	-0.118944	-0.118189	0.0183417	-0.320425	-0.000870568	-0.173422	-0.0304445	-0.101842	0.0504359	-0.00755344	0.000653893
	Contribution of the variables (%):
		F1	F2	F3	F4	F5	F6	F7	F8	F9	F10	F11	F12
	HT	0.0105944	23.6666	20.7683	4.60889	1.34776	3.06439	9.28464	0.452763	2.00067	0.816577	31.4752	2.5037
	MAT	2.54231	21.4553	0.998801	6.36868	22.417	8.08564	6.28108	10.9119	5.27179	11.8576	3.19552	0.614354
	PH	10.7834	5.47594	1.28956e-06	1.79983	29.6949	1.11681	6.49799	23.3531	10.0035	1.04615	8.08418	2.1442
	LOD	14.799	0.810914	0.16121	0.229235	0.140634	6.84548	4.25783	2.78666	14.696	28.2191	25.6945	1.35951
	NGPS	5.06838	16.1971	11.8364	2.09069	0.264928	2.63635	21.5033	9.94482	0.0333463	3.26008	13.5349	13.6297
	NSPS	0.579132	21.3535	5.00858	32.0479	3.31458	7.62338	0.166704	1.5674	1.74953	0.918208	3.84091	21.8301
	TSW	12.9378	0.61449	0.00477717	18.3108	3.1438	5.36533	0.856122	18.9644	1.28234	0.192347	0.735774	37.592
	HW	4.85475	7.33464	43.3775	1.25928	0.0920676	0.694422	10.5065	5.0221	5.20629	0.924413	0.778074	19.95
	GY	13.3762	0.0540238	8.60369	3.28265	0.170911	0.388914	18.3526	19.1082	1.7471	26.6566	8.25905	4.39444e-05
	AA	9.10714	1.59693	0.408451	29.9197	0.0885127	55.5303	0.728334	0.250204	1.21451	0.594246	0.331998	0.229718
	DP	12.782	0.980226	7.44247	0.0331515	10.5056	8.64875	1.95736	6.45649	37.239	10.7661	3.08115	0.107751
	ME	13.1593	0.460354	1.3898	0.0492132	28.8193	0.000249019	19.6075	1.18189	19.5559	14.7486	0.988817	0.0389433
	Squared cosines of the variables:
		F1	F2	F3	F4	F5	F6	F7	F8	F9	F10	F11	F12
	HT	0.000664113	0.727321	0.208738	0.031506	0.00480155	0.00932646	0.0142414	0.000355067	0.00106109	0.00014084	0.00181611	2.74892e-05
	MAT	0.159366	0.659363	0.0100388	0.0435358	0.0798629	0.0246086	0.00963433	0.0085574	0.00279598	0.00204515	0.000184381	6.74525e-06
	PH	0.675963	0.168287	1.29611e-08	0.0123035	0.105791	0.003399	0.00996703	0.018314	0.00530553	0.000180436	0.000466455	2.3542e-05
	LOD	0.927681	0.024921	0.0016203	0.00156703	0.000501024	0.0208342	0.00653093	0.00218537	0.00779425	0.00486711	0.00148257	1.49267e-05
	NGPS	0.317714	0.497768	0.118966	0.0142918	0.000943834	0.00802372	0.0329832	0.00779896	1.76858e-05	0.000562285	0.000780958	0.000149647
	NSPS	0.0363032	0.656237	0.0503405	0.219077	0.0118086	0.0232017	0.000255702	0.00122919	0.000927895	0.000158369	0.000221619	0.000239682
	TSW	0.811013	0.0188845	4.80146e-05	0.125171	0.0112001	0.0163294	0.00131318	0.0148724	0.000680111	3.31752e-05	4.2454e-05	0.000412738
	HW	0.304323	0.225408	0.435981	0.00860836	0.000328001	0.00211347	0.0161155	0.00393845	0.00276124	0.000159439	4.48947e-05	0.000219039
	GY	0.838497	0.00166026	0.0864743	0.02244	0.000608889	0.00118366	0.0281504	0.0149851	0.000926606	0.00459761	0.000476545	4.82484e-10
	AA	0.570886	0.0490767	0.00410527	0.204529	0.000315336	0.169006	0.00111716	0.000196216	0.000644134	0.000102493	1.91562e-05	2.52217e-06
	DP	0.801244	0.0301243	0.0748031	0.000226621	0.0374272	0.0263224	0.00300233	0.00506333	0.0197504	0.00185689	0.000177781	1.18304e-06
	ME	0.824899	0.0141476	0.0139687	0.000336418	0.102672	7.57889e-07	0.0300753	0.000926868	0.0103718	0.00254378	5.70545e-05	4.27575e-07
	Values in bold correspond for each variable to the factor for which the squared cosine is the largest
	Factor scores:
	Observation	F1	F2	F3	F4	F5	F6	F7	F8	F9	F10	F11	F12
	Aydanhanim	-2.92524	3.67771	-1.15572	0.202474	-0.22508	0.45201	0.120055	0.298182	0.430562	0.119629	-0.0163737	0.035774
	Basgul	2.39614	0.559011	0.502244	0.119728	-0.54914	0.0919366	0.00952275	-0.247777	-0.229838	0.311107	-0.131203	-0.0163219
	Bolayir	-1.34585	-2.06807	0.183534	-0.335282	-0.604859	-0.831354	0.111199	0.394719	-0.148377	-0.112182	-0.0884084	0.0399288
	Catalhoyuk	3.28065	0.542105	-0.517032	-0.300125	-0.420113	-0.0270449	-0.0605687	-0.208671	-0.0476235	-0.0802215	0.049955	0.0130866
	Cumra-2001	-1.80028	3.55163	0.122027	-0.00454945	0.535202	-1.13031	0.568243	-0.0778031	-0.265636	-0.0782268	0.0302364	-0.0350022
	Durusu	-3.0193	0.528778	0.606861	0.665865	0.556504	0.118683	-0.883385	-0.39728	0.0120852	-0.188049	-0.077788	0.0229519
	Efes-98	3.2785	0.652305	0.202216	-0.332281	-0.42737	0.208439	0.00245813	-0.25725	0.0688552	-0.0938185	0.162963	0.0212136
	Erciyes	3.18762	0.269692	-0.345579	-0.37933	0.0872253	-0.239572	0.146229	-0.242407	0.0698688	-0.0123857	-0.0893054	0.0492006
	Harrington	-1.82536	-1.62255	-2.75908	-0.335923	-0.552973	-0.174938	-0.353769	-0.152959	0.00944281	-0.0093925	0.00602175	-0.0603077
	Ince-04	-1.5144	-0.416408	0.187696	1.85644	-0.408385	0.297521	-0.173925	0.212614	-0.428655	0.0970816	0.10766	0.0212681
	Kalayci-97	1.71004	-0.492728	-0.0296033	0.889189	1.12433	0.625148	0.244208	-0.0597786	0.0484323	-0.00590111	-0.035401	-0.0400466
	Ozdemir-05	3.01106	-1.54562	-0.910068	0.486502	0.650827	0.311394	0.297653	0.46708	0.00141259	-0.120716	-0.0287758	0.00352107
	Sladoran	-1.8833	-2.14463	0.0293883	-1.27094	1.2052	-0.333039	-0.144713	-0.0341185	0.00979524	0.247382	0.0912741	0.0298698
	Tokak 157/37	2.40098	1.14705	1.48972	-0.600709	-0.105675	-0.267921	-0.762929	0.523249	0.174323	0.0130153	0.0136158	-0.0484522
	Yildiz	-3.17304	-0.192799	0.987252	-1.59559	-0.331481	1.27979	0.387931	0.00787118	-0.202667	-0.0989091	-0.0170871	-0.0156471
	Zeynelaga	-1.77822	-2.44547	1.40615	0.934527	-0.534221	-0.380749	0.49179	-0.225671	0.498019	0.0115874	0.0226164	-0.0210367
	Contribution of the observations (%):
		F1	F2	F3	F4	F5	F6	F7	F8	F9	F10	F11	F12
	Aydanhanim	8.53168	27.507	8.30589	0.374819	0.888765	4.19569	0.587288	7.08606	21.8461	5.18592	0.290404	7.28509
	Basgul	5.72447	0.635521	1.56858	0.131061	5.29027	0.173574	0.00369503	4.89286	6.2251	35.0729	18.6464	1.51649
	Bolayir	1.80594	8.69801	0.209464	1.02779	6.4183	14.1932	0.503842	12.417	2.59439	4.56037	8.4663	9.07554
	Catalhoyuk	10.7308	0.597663	1.66231	0.823546	3.09631	0.0150203	0.149482	3.47027	0.267267	2.33203	2.70311	0.974886
	Cumra-2001	3.2314	25.6534	0.0925957	0.000189234	5.02514	26.2361	13.1571	0.48243	8.3153	2.2175	0.990302	6.97414
	Durusu	9.08921	0.568638	2.29011	4.05374	5.4331	0.289257	31.7975	12.5786	0.0172111	12.8143	6.55438	2.99874
	Efes-98	10.7168	0.865349	0.254277	1.00947	3.2042	0.892205	0.000246209	5.27413	0.558698	3.18955	28.7662	2.5617
	Erciyes	10.1308	0.14792	0.74263	1.31558	0.133474	1.17864	0.871287	4.68307	0.575267	0.0555895	8.63897	13.7797
	Harrington	3.32208	5.35408	47.3376	1.03172	5.36438	0.628454	5.09955	1.86463	0.0105077	0.0319679	0.0392782	20.7036
	Ince-04	2.28662	0.352637	0.219073	31.5099	2.92585	1.81778	1.23259	3.60266	21.6531	3.41528	12.555	2.57489
	Kalayci-97	2.91557	0.493747	0.00544951	7.22888	22.177	8.02551	2.43004	0.284794	0.276423	0.0126189	1.35749	9.12919
	Ozdemir-05	9.03964	4.85844	5.15021	2.16398	7.43094	1.99126	3.61006	17.3869	0.000235146	5.28058	0.896934	0.0705749
	Sladoran	3.5363	9.35394	0.00537065	14.7683	25.482	2.2777	0.853317	0.0927726	0.0113066	22.1762	9.02405	5.07884
	Tokak 157/37	5.74763	2.67578	13.8003	3.29922	0.195911	1.47408	23.7171	21.8201	3.58106	0.0613844	0.200814	13.3637
	Yildiz	10.0384	0.0755958	6.06085	23.277	1.92765	33.6346	6.13201	0.00493765	4.84026	3.54507	0.316259	1.39369
	Zeynelaga	3.15269	12.1622	12.2953	7.98484	5.00673	2.97704	9.8549	4.05875	29.2278	0.0486546	0.554058	2.51917
	Squared cosines of the observations:
		F1	F2	F3	F4	F5	F6	F7	F8	F9	F10	F11	F12
	Aydanhanim	0.356263	0.563123	0.0556107	0.00170682	0.00210923	0.00850639	0.000600078	0.0037018	0.00771827	0.000595831	1.11621e-05	5.32824e-05
	Basgul	0.837055	0.0455587	0.0367756	0.00208988	0.043964	0.00123227	1.32207e-05	0.00895062	0.00770148	0.0141108	0.00250969	3.88393e-05
	Bolayir	0.241395	0.569989	0.00448918	0.0149815	0.0487579	0.0921103	0.00164793	0.020764	0.00293406	0.0016772	0.00104165	0.000212475
	Catalhoyuk	0.923854	0.0252262	0.0229467	0.00773196	0.0151501	6.27849e-05	0.000314906	0.00373772	0.000194682	0.000552416	0.000214211	1.47007e-05
	Cumra-2001	0.181652	0.706996	0.000834593	1.16005e-06	0.0160545	0.0716066	0.018098	0.000339278	0.0039549	0.000342983	5.12416e-05	6.86676e-05
	Durusu	0.791919	0.0242892	0.0319923	0.0385159	0.0269032	0.00122361	0.0677903	0.0137107	1.26874e-05	0.00307192	0.000525645	4.57621e-05
	Efes-98	0.921975	0.0364981	0.0035075	0.00947061	0.0156666	0.00372671	5.18297e-07	0.00567647	0.000406669	0.000754996	0.00227795	3.86008e-05
	Erciyes	0.953401	0.00682464	0.0112057	0.0135014	0.000713886	0.00538539	0.00200637	0.00551358	0.000458047	1.43941e-05	0.000748341	0.000227135
	Harrington	0.234995	0.185677	0.536897	0.00795867	0.021566	0.00215838	0.00882675	0.00165011	6.28876e-06	6.22192e-06	2.55745e-06	0.000256512
	Ince-04	0.353682	0.0267405	0.00543303	0.53149	0.02572	0.0136511	0.00466504	0.0069713	0.0283366	0.00145347	0.00178749	6.97573e-05
	Kalayci-97	0.514654	0.0427287	0.000154235	0.139153	0.222482	0.0687812	0.010496	0.00062892	0.000412833	6.12875e-06	0.000220564	0.000282252
	Ozdemir-05	0.678474	0.178773	0.0619786	0.0177119	0.0316976	0.00725629	0.00663003	0.0163259	1.49324e-07	0.00109049	6.19653e-05	9.27778e-07
	Sladoran	0.310621	0.402808	7.56384e-05	0.141462	0.127208	0.00971366	0.00183405	0.000101947	8.40279e-06	0.00535956	0.000729606	7.81371e-05
	Tokak 157/37	0.542181	0.123745	0.208727	0.0339388	0.0010503	0.0067512	0.0547439	0.0257505	0.00285809	1.59321e-05	1.74363e-05	0.000220798
	Yildiz	0.646406	0.0023865	0.0625763	0.163455	0.00705457	0.105156	0.00966192	3.97772e-06	0.00263705	0.000628096	1.87452e-05	1.57189e-05
	Zeynelaga	0.243887	0.461258	0.152505	0.0673602	0.0220121	0.0111814	0.0186543	0.003928	0.0191299	1.0356e-05	3.9452e-05	3.41332e-05
	Values in bold correspond for each observation to the factor for which the squared cosine is the largest

## Sheet: Data_for_Spring_trials
		HT	MAT	PH	LOD	NGPS	NSPS	TSW	HW	GY	AA	DP	ME
	Aydanhanim	93.8	90.5	122.6	3.1	29.2	290.2	3.7	43.5	58.8	74.6	229.4	75
	Basgul	71.3	94.1	108.1	60	21.9	363.8	4.1	50.9	63.8	61.4	89.8	74.1
	Bolayir	89.6	75.4	115.5	0	25.2	403	4.4	42.6	60.8	97.3	299.9	77
	Catalhoyuk	72.6	92.6	106.1	67.5	21.8	344	3.6	48.3	61.9	69.8	124	73.3
	Durusu	90.9	81.6	119.3	0	23.9	378.5	4.7	50.3	63.1	112.5	239.6	77
	Efes-98	71.8	92.1	106.8	56.3	22.6	282.2	3	47.4	62.6	60.3	130.6	73.6
	Erciyes	72.4	86.3	107.3	57.5	20.7	434.3	4.3	47.2	63.1	64.8	97	71.9
	Harrington	77.9	87	114.1	0	27.7	385.3	4.4	41.6	63.2	196	325.9	81.3
	Ince-04	76.4	89.5	113.3	6.9	22.3	418.5	4.8	51.4	65.7	111.5	275.7	80.4
	Kalayci-97	75.5	88.9	110.3	55	21.4	356.9	3.7	48	63.4	78	101.6	70.2
	Ozdemir-05	72.9	83.3	108.3	50	21.8	420.6	4	43.9	63	63.1	131.7	72.7
	Sladoran	92.6	71.1	118.5	0.6	23.4	368.8	3.6	41.3	62.5	95.1	218.3	76.3
	Tokak 157/37	75.1	93.4	110.1	62.5	21.8	336.3	3.8	52	62.7	56.8	138.4	74.2
	Yildiz	84.9	80.1	117.4	0	26	267.5	3.4	46.9	60.7	115.7	222.7	77.8
	Zeynelaga	72.1	76.6	109.4	0	21.2	471.2	4.7	47.7	65.2	106.3	291.6	76.2

## Sheet: PCA_HID1
	-1.12792	-2.04553	0.353673	0.742106	1.86886	-0.270817	-1.10108	-1.44909	-0.304737	0.562337	-0.470802	0.582598	-1.44649	-0.727403	-0.362373	0.694026	0.0261907	0.180597	-0.0657074	0.18798	0.185509	-0.065741	-0.0253493	0.0140057
	1.187	0.174236	0.738963	0.435001	0.418978	0.349667	-0.45049	0.654492	-1.74441	-1.71469	0.522636	1.16856	1.11433	-0.37069	1.24423	-0.0427269	0.588686	0.0831853	-0.220343	-0.0572534	0.0975405	0.0184221	-0.0521611	-0.00188209
	-1.21378	-0.00475049	-1.21501	0.0456945	0.825705	-1.7626	0.640556	0.810836	1.00842	-1.37363	0.440876	-1.12928	-1.56583	-0.554627	0.0257826	0.676905	0.0392566	0.300582	-0.131031	-0.0624703	-0.0513271	0.107491	0.0366209	-0.0135139
	1.10049	-0.488414	0.308716	-0.609139	0.218474	-0.738123	0.864315	1.01236	1.3558	0.636263	-1.75173	0.77295	1.74735	-0.304898	0.0497735	-0.214602	0.225651	0.0863513	0.0386039	0.260807	0.12352	0.0201632	0.0932779	-0.00171733
	-0.84702	0.491835	0.274307	2.07156	-0.00638468	1.1711	1.10797	0.366108	0.479468	-1.2567	0.107532	0.249183	-1.4473	-0.834798	0.507633	-0.256404	0.442673	-0.00391705	-0.0116181	-0.112874	-0.128257	-0.0520576	0.0584157	0.0233394
	1.04167	-1.03809	0.583735	-1.01245	-1.35897	-0.760419	-0.964372	-0.688874	0.559336	-1.80296	-0.248699	-0.189997	0.0115547	1.6	-0.729438	-0.0255248	0.490851	-0.0183208	-0.0677298	0.0262723	0.0068621	0.0815948	-0.0134171	0.0258911
	1.04882	0.501642	-1.03126	-0.0445287	1.14911	0.402001	0.709402	0.629715	-0.971134	0.596587	-1.4507	0.167474	-0.554014	1.52278	0.039956	0.484107	0.676229	0.00674092	0.126451	0.0597363	-0.0559635	-0.0681712	0.00932747	-0.021869
	-1.50178	0.75298	1.43064	-2.50843	0.764817	1.14538	0.276227	0.362421	0.276856	0.0329131	0.578393	0.450963	1.05588	0.478779	0.88713	1.02859	-0.282989	-0.108806	0.252084	-0.0391879	-0.00877571	0.0194319	0.0118885	0.016497
	-0.286858	1.71088	1.46123	0.925655	-0.334074	-0.374165	-1.75991	0.263426	0.071491	0.681757	-1.17858	-1.60333	0.580534	1.59624	0.200426	0.0017142	-0.442783	0.333845	-0.311457	-0.112472	0.0114834	-0.0575486	0.0342686	0.00420245
	1.00723	-0.293613	-0.409984	0.0416823	-0.109821	2.08063	0.645251	-1.67297	1.18503	0.0333175	0.0856604	-1.31874	-1.35132	0.665423	0.572367	-0.663101	-0.109897	0.424841	0.334178	0.029464	0.0695432	0.0233395	-0.0176971	0.00203111
	0.69127	0.205486	-1.3583	-0.815625	0.69427	-0.05304	-0.706607	0.166199	-1.17227	0.406204	1.24317	-1.47974	-1.63132	0.611949	0.217355	-0.116187	-0.0491967	-0.39359	-0.0249186	-0.186935	0.236812	0.014489	0.0364361	-0.00553626
	-1.0136	-0.431313	-1.83418	0.00502142	-1.63502	1.08741	-1.56566	1.11282	0.348114	0.504669	-0.164029	1.12532	-1.4141	0.631194	0.789922	-0.149327	-0.272831	-0.240218	-0.182067	0.358434	-0.091665	0.0201751	-0.0061918	0.000413093
	1.0159	-0.305236	0.853977	0.860761	-0.119157	-0.641952	0.122044	0.674406	0.964639	1.64794	2.38569	0.535588
	-0.894178	-1.16063	0.620709	-0.0363251	-1.79352	-0.41354	1.73527	0.0084596	-1.8933	0.764462	-0.22938	-0.852514
	-0.207249	1.93052	-0.777215	-0.10098	-0.583274	-1.22154	0.447077	-2.2503	-0.163288	0.281539	0.129968	1.52096

## Sheet: Spring_PCA
	XLSTAT 2016.02.27444 - Principal Component Analysis (PCA) - Start time: 2.06.2023 at 15:22:05
	Observations/variables table: Workbook = PCA.xlsx / Sheet = Spring / Range = Spring!$B:$M / 15 rows and 12 columns
	Observation labels: Workbook = PCA.xlsx / Sheet = Spring / Range = Spring!$A:$A / 15 rows and 1 column
	PCA type: Pearson (n)
	Type of biplot: Correlation biplot / Coefficient = Automatic
	Summary statistics:
	Variable	Observations	Obs. with missing data	Obs. without missing data	Minimum	Maximum	Mean	Std. deviation
	HT	15	0	15	71.3	93.8	79.32	8.48168
	MAT	15	0	15	71.1	94.1	85.5	7.18918
	PH	15	0	15	106.1	122.6	112.473	5.19718
	LOD	15	0	15	0	67.5	27.96	29.7545
	NGPS	15	0	15	20.7	29.2	23.3933	2.53954
	NSPS	15	0	15	267.5	471.2	368.073	58.0852
	TSW	15	0	15	3	4.8	4.01333	0.530319
	HW	15	0	15	41.3	52	46.8667	3.55018
	GY	15	0	15	58.8	65.7	62.7	1.71381
	AA	15	0	15	56.8	196	90.88	36.0045
	DP	15	0	15	89.8	325.9	194.413	82.0513
	ME	15	0	15	70.2	81.3	75.4	3.04326
	Correlation matrix (Pearson (n)):
	Variables	HT	MAT	PH	LOD	NGPS	NSPS	TSW	HW	GY	AA	DP	ME
	HT	1	-0.528964	0.945128	-0.71274	0.689503	-0.274397	0.00914694	-0.459269	-0.603281	0.260622	0.50531	0.360658
	MAT	-0.528964	1	-0.436351	0.673861	-0.121909	-0.353469	-0.236811	0.546428	0.0433063	-0.331208	-0.5358	-0.295724
	PH	0.945128	-0.436351	1	-0.80616	0.775728	-0.272787	0.106394	-0.379862	-0.496802	0.414941	0.605752	0.510502
	LOD	-0.71274	0.673861	-0.80616	1	-0.63817	-0.11469	-0.408726	0.432951	0.127972	-0.703156	-0.915204	-0.77663
	NGPS	0.689503	-0.121909	0.775728	-0.63817	1	-0.45004	-0.0810762	-0.556746	-0.671898	0.535471	0.586294	0.541135
	NSPS	-0.274397	-0.353469	-0.272787	-0.11469	-0.45004	1	0.808705	-0.0144418	0.658555	0.169577	0.235049	0.0939728
	TSW	0.00914694	-0.236811	0.106394	-0.408726	-0.0810762	0.808705	1	0.153526	0.531275	0.427453	0.515108	0.454091
	HW	-0.459269	0.546428	-0.379862	0.432951	-0.556746	-0.0144418	0.153526	1	0.469355	-0.362987	-0.388362	-0.179032
	GY	-0.603281	0.0433063	-0.496802	0.127972	-0.671898	0.658555	0.531275	0.469355	1	0.141387	-0.00136639	0.119286
	AA	0.260622	-0.331208	0.414941	-0.703156	0.535471	0.169577	0.427453	-0.362987	0.141387	1	0.792836	0.822807
	DP	0.50531	-0.5358	0.605752	-0.915204	0.586294	0.235049	0.515108	-0.388362	-0.00136639	0.792836	1	0.86825
	ME	0.360658	-0.295724	0.510502	-0.77663	0.541135	0.0939728	0.454091	-0.179032	0.119286	0.822807	0.86825	1
	Principal Component Analysis:
	Eigenvalues:
		F1	F2	F3	F4	F5	F6	F7	F8	F9	F10	F11	F12
	Eigenvalue	5.73047	3.17772	1.28472	0.843151	0.495658	0.195442	0.118984	0.0914289	0.0451084	0.0106031	0.00599929	0.000718071
	Variability (%)	47.7539	26.481	10.706	7.02626	4.13048	1.62868	0.991535	0.761907	0.375903	0.0883591	0.0499941	0.00598392
	Cumulative %	47.7539	74.2349	84.9409	91.9672	96.0976	97.7263	98.7179	99.4798	99.8557	99.944	99.994	100
	Eigenvectors:
		F1	F2	F3	F4	F5	F6	F7	F8	F9	F10	F11	F12
	HT	-0.33029	-0.223045	-0.174753	0.41314	0.0203344	0.223294	-0.104122	0.339817	0.477432	-0.348975	-0.178892	0.285689
	MAT	0.254446	-0.113665	0.600027	-0.0254345	0.457053	0.102852	-0.349164	-0.103498	0.251033	0.0977908	-0.368104	-0.0383911
	PH	-0.357539	-0.170066	0.0124336	0.402949	0.0304787	0.371646	-0.207637	-0.112929	-0.132097	0.570596	0.258436	-0.275658
	LOD	0.398987	-0.0934913	0.0240031	-0.127748	0.175195	0.106766	0.0611732	0.471467	0.317895	0.107033	0.658268	-0.0350303
	NGPS	-0.330474	-0.255975	0.244804	-0.152632	0.343689	-0.00484312	-0.0184105	-0.204045	-0.330086	-0.276339	0.412244	0.476081
	NSPS	0.00263839	0.49061	-0.351769	-0.0151944	0.381095	-0.0226521	-0.107327	0.0474931	0.0176605	0.433132	-0.0946854	0.528129
	TSW	-0.126503	0.466931	0.0192687	0.28818	0.525022	0.00833461	0.200379	0.107987	-0.144029	-0.361875	0.0658246	-0.446086
	HW	0.241098	0.146809	0.427816	0.612297	-0.219712	-0.13453	0.399461	-0.070841	-0.0225854	0.103151	0.0838978	0.336508
	GY	0.132558	0.489457	0.0966549	0.00102043	-0.343775	0.412773	-0.493546	-0.203318	0.029554	-0.305487	0.241836	0.0857223
	AA	-0.308558	0.20404	0.276022	-0.394731	-0.0853237	0.525281	0.529551	0.0532629	0.178978	0.123894	-0.12489	0.041431
	DP	-0.372493	0.187643	0.104819	-0.0691641	-0.0381961	-0.486642	-0.0394869	-0.337928	0.609467	0.0769122	0.257132	-0.112929
	ME	-0.322893	0.193544	0.380937	-0.0888915	-0.211825	-0.29701	-0.28851	0.64795	-0.235912	0.107096	-0.0436959	0.00842633
	Factor loadings:
		F1	F2	F3	F4	F5	F6	F7	F8	F9	F10	F11	F12
	HT	-0.79066	-0.397603	-0.198075	0.379359	0.014316	0.0987155	-0.035916	0.102751	0.101401	-0.0359344	-0.0138561	0.00765557
	MAT	0.609102	-0.202622	0.680104	-0.0233548	0.321779	0.0454696	-0.120441	-0.031295	0.0533162	0.0100696	-0.0285116	-0.00102876
	PH	-0.85589	-0.303162	0.0140929	0.37	0.0214579	0.1643	-0.0716224	-0.0341466	-0.0280557	0.0587551	0.0200172	-0.00738675
	LOD	0.95511	-0.166659	0.0272065	-0.117303	0.123342	0.0472001	0.0211011	0.142558	0.0675169	0.0110213	0.0509862	-0.000938702
	NGPS	-0.791103	-0.456306	0.277475	-0.140152	0.241968	-0.00214108	-0.00635054	-0.0616974	-0.070106	-0.028455	0.0319304	0.0127575
	NSPS	0.00631589	0.874569	-0.398715	-0.013952	0.268302	-0.0100142	-0.0370215	0.0143606	0.00375086	0.0446002	-0.00733387	0.0141522
	TSW	-0.302827	0.832358	0.0218402	0.264616	0.369631	0.00368463	0.0691188	0.0326522	-0.03059	-0.0372628	0.00509845	-0.0119537
	HW	0.577149	0.261703	0.48491	0.562231	-0.154684	-0.059474	0.13779	-0.0214203	-0.00479685	0.0106216	0.00649831	0.00901734
	GY	0.317323	0.872513	0.109554	0.000936992	-0.242028	0.182482	-0.170244	-0.0614777	0.0062769	-0.0314564	0.0187314	0.00229709
	AA	-0.738639	0.363724	0.312859	-0.362455	-0.0600705	0.23222	0.182664	0.0161052	0.0380127	0.0127575	-0.00967335	0.00111022
	DP	-0.891688	0.334495	0.118808	-0.0635088	-0.0268912	-0.215138	-0.0136206	-0.10218	0.129443	0.00791975	0.0199162	-0.00302615
	ME	-0.772954	0.345014	0.431776	-0.0816231	-0.149131	-0.131304	-0.0995189	0.195922	-0.0501046	0.0110279	-0.00338447	0.000225799
	Correlations between variables and factors:
		F1	F2	F3	F4	F5	F6	F7	F8	F9	F10	F11	F12
	HT	-0.79066	-0.397603	-0.198075	0.379359	0.014316	0.0987155	-0.035916	0.102751	0.101401	-0.0359344	-0.0138561	0.00765557
	MAT	0.609102	-0.202622	0.680104	-0.0233548	0.321779	0.0454696	-0.120441	-0.031295	0.0533162	0.0100696	-0.0285116	-0.00102876
	PH	-0.85589	-0.303162	0.0140929	0.37	0.0214579	0.1643	-0.0716224	-0.0341466	-0.0280557	0.0587551	0.0200172	-0.00738675
	LOD	0.95511	-0.166659	0.0272065	-0.117303	0.123342	0.0472001	0.0211011	0.142558	0.0675169	0.0110213	0.0509862	-0.000938702
	NGPS	-0.791103	-0.456306	0.277475	-0.140152	0.241968	-0.00214108	-0.00635054	-0.0616974	-0.070106	-0.028455	0.0319304	0.0127575
	NSPS	0.00631589	0.874569	-0.398715	-0.013952	0.268302	-0.0100142	-0.0370215	0.0143606	0.00375086	0.0446002	-0.00733387	0.0141522
	TSW	-0.302827	0.832358	0.0218402	0.264616	0.369631	0.00368463	0.0691188	0.0326522	-0.03059	-0.0372628	0.00509845	-0.0119537
	HW	0.577149	0.261703	0.48491	0.562231	-0.154684	-0.059474	0.13779	-0.0214203	-0.00479685	0.0106216	0.00649831	0.00901734
	GY	0.317323	0.872513	0.109554	0.000936992	-0.242028	0.182482	-0.170244	-0.0614777	0.0062769	-0.0314564	0.0187314	0.00229709
	AA	-0.738639	0.363724	0.312859	-0.362455	-0.0600705	0.23222	0.182664	0.0161052	0.0380127	0.0127575	-0.00967335	0.00111022
	DP	-0.891688	0.334495	0.118808	-0.0635088	-0.0268912	-0.215138	-0.0136206	-0.10218	0.129443	0.00791975	0.0199162	-0.00302615
	ME	-0.772954	0.345014	0.431776	-0.0816231	-0.149131	-0.131304	-0.0995189	0.195922	-0.0501046	0.0110279	-0.00338447	0.000225799
	Contribution of the variables (%):
		F1	F2	F3	F4	F5	F6	F7	F8	F9	F10	F11	F12
	HT	10.9091	4.97489	3.05387	17.0685	0.0413486	4.98602	1.08414	11.5476	22.7941	12.1784	3.20022	8.16184
	MAT	6.47425	1.29198	36.0032	0.0646913	20.8898	1.05785	12.1915	1.07119	6.30176	0.956304	13.5501	0.147387
	PH	12.7834	2.89225	0.0154594	16.2367	0.0928949	13.8121	4.3113	1.2753	1.74496	32.558	6.67892	7.59871
	LOD	15.919	0.874063	0.0576149	1.63197	3.06931	1.13991	0.374216	22.2281	10.1058	1.1456	43.3317	0.122712
	NGPS	10.9213	6.55234	5.99291	2.32966	11.8122	0.00234558	0.0338947	4.16342	10.8957	7.63632	16.9945	22.6653
	NSPS	0.000696112	24.0699	12.3741	0.023087	14.5233	0.051312	1.15191	0.225559	0.0311893	18.7603	0.896533	27.8921
	TSW	1.60029	21.8025	0.0371282	8.30475	27.5648	0.00694657	4.01516	1.16612	2.07444	13.0954	0.433288	19.8993
	HW	5.81281	2.15528	18.3026	37.4907	4.82732	1.80983	15.9569	0.501845	0.0510101	1.06401	0.703884	11.3237
	GY	1.75717	23.9568	0.934217	0.000104128	11.8181	17.0382	24.3588	4.13382	0.087344	9.33224	5.84846	0.734831
	AA	9.52083	4.16321	7.61882	15.5812	0.728014	27.5921	28.0424	0.283694	3.20333	1.53496	1.55975	0.171652
	DP	13.8751	3.52098	1.0987	0.478368	0.145894	23.682	0.155921	11.4195	37.145	0.591548	6.61169	1.27531
	ME	10.426	3.74592	14.5113	0.79017	4.48699	8.82148	8.3238	41.9839	5.56543	1.14696	0.190933	0.0071003
	Squared cosines of the variables:
		F1	F2	F3	F4	F5	F6	F7	F8	F9	F10	F11	F12
	HT	0.625144	0.158088	0.0392337	0.143913	0.000204948	0.00974476	0.00128996	0.0105578	0.0102821	0.00129128	0.00019199	5.86078e-05
	MAT	0.371005	0.0410555	0.462541	0.000545445	0.103542	0.00206748	0.014506	0.00097938	0.00284262	0.000101398	0.000812909	1.05834e-06
	PH	0.732548	0.0919074	0.000198611	0.1369	0.000460441	0.0269945	0.00512976	0.00116599	0.000787121	0.00345216	0.000400688	5.45641e-05
	LOD	0.912235	0.0277752	0.000740193	0.01376	0.0152133	0.00222785	0.000445258	0.0203229	0.00455854	0.000121469	0.0025996	8.81162e-07
	NGPS	0.625844	0.208215	0.0769924	0.0196426	0.0585483	4.58424e-06	4.03294e-05	0.00380657	0.00491485	0.000809687	0.00101955	0.000162753
	NSPS	3.98905e-05	0.764872	0.158974	0.000194659	0.071986	0.000100285	0.00137059	0.000206226	1.4069e-05	0.00198918	5.37856e-05	0.000200285
	TSW	0.0917043	0.69282	0.000476994	0.0700216	0.136627	1.35765e-05	0.00477741	0.00106617	0.000935746	0.00138851	2.59942e-05	0.000142891
	HW	0.333101	0.0684886	0.235138	0.316103	0.023927	0.00353716	0.0189862	0.000458831	2.30098e-05	0.000112819	4.22281e-05	8.13125e-05
	GY	0.100694	0.761278	0.0120021	8.77955e-07	0.0585775	0.0332996	0.0289831	0.00377951	3.93994e-05	0.000989506	0.000350866	5.2766e-06
	AA	0.545588	0.132295	0.0978808	0.131373	0.00360846	0.0539263	0.0333661	0.000259378	0.00144497	0.000162753	9.35738e-05	1.23259e-06
	DP	0.795107	0.111887	0.0141153	0.00403336	0.000723137	0.0462845	0.000185522	0.0104407	0.0167555	6.27225e-05	0.000396655	9.1576e-06
	ME	0.597459	0.119035	0.18643	0.00666233	0.0222401	0.0172408	0.00990401	0.0383854	0.00251047	0.000121614	1.14546e-05	5.09851e-08
	Values in bold correspond for each variable to the factor for which the squared cosine is the largest
	Factor scores:
	Observation	F1	F2	F3	F4	F5	F6	F7	F8	F9	F10	F11	F12
	Aydanhanim	-2.70007	-3.64639	0.400872	0.681426	1.31573	-0.119725	-0.379807	-0.438165	-0.0647223	0.0579046	-0.036466	0.0156118
	Basgul	2.84148	0.310597	0.837582	0.399432	0.294973	0.154583	-0.155392	0.1979	-0.37049	-0.176564	0.0404808	0.0313138
	Bolayir	-2.90559	-0.00846829	-1.37716	0.0419582	0.581321	-0.779225	0.220954	0.245174	0.214175	-0.141445	0.0341481	-0.0302611
	Catalhoyuk	2.6344	-0.870654	0.349916	-0.559332	0.153812	-0.326315	0.298138	0.306109	0.287954	0.0655169	-0.13568	0.0207126
	Durusu	-2.02763	0.876752	0.310915	1.90218	-0.004495	0.517731	0.382185	0.110701	0.101833	-0.129404	0.00832892	0.00667731
	Efes-98	2.49359	-1.85052	0.661638	-0.929669	-0.956752	-0.336172	-0.332651	-0.208296	0.118796	-0.185653	-0.019263	-0.00509133
	Erciyes	2.51072	0.894234	-1.16889	-0.0408877	0.809007	0.17772	0.244702	0.190408	-0.206257	0.0614314	-0.112364	0.00448778
	Harrington	-3.59502	1.34227	1.62157	-2.30332	0.538454	0.50636	0.0952819	0.109586	0.0588007	0.00338911	0.0447995	0.0120844
	Ince-04	-0.686692	3.04983	1.65624	0.849966	-0.235198	-0.165414	-0.607064	0.0796526	0.0151838	0.0702015	-0.091287	-0.0429641
	Kalayci-97	2.41115	-0.523398	-0.464699	0.038274	-0.0773174	0.91982	0.222573	-0.505859	0.251684	0.00343075	0.00663484	-0.0353382
	Ozdemir-05	1.65479	0.366303	-1.53957	-0.748933	0.488787	-0.0234483	-0.243738	0.0502539	-0.248976	0.0418273	0.0962896	-0.0396525
	Sladoran	-2.4264	-0.768864	-2.07897	0.00461083	-1.1511	0.480732	-0.540062	0.336486	0.073935	0.0519665	-0.0127049	0.0301551
	Tokak 157/37	2.4319	-0.544119	0.967945	0.790379	-0.0838898	-0.283799	0.042098	0.203922	0.204877	0.16969	0.184784	0.0143521
	Yildiz	-2.14052	-2.06896	0.703546	-0.0333549	-1.26269	-0.182821	0.598566	0.00255795	-0.402113	0.0787177	-0.0177666	-0.0228447
	Zeynelaga	-0.49612	3.44138	-0.88094	-0.0927234	-0.410642	-0.540027	0.154215	-0.680429	-0.0346803	0.0289904	0.0100666	0.040757
	Contribution of the observations (%):
		F1	F2	F3	F4	F5	F6	F7	F8	F9	F10	F11	F12
	Aydanhanim	8.4814	27.8946	0.833895	3.67148	23.2843	0.488945	8.08248	13.9991	0.619098	2.10815	1.4777	2.26281
	Basgul	9.3931	0.202389	3.64044	1.26151	1.17028	0.815114	1.35294	2.85573	20.2864	19.6012	1.82099	9.1036
	Bolayir	9.82169	0.000150448	9.84161	0.0139199	4.54525	20.7118	2.73542	4.38303	6.7794	12.5791	1.29581	8.50182
	Catalhoyuk	8.07385	1.59032	0.63537	2.47367	0.318206	3.63217	4.98027	6.83245	12.2545	2.69887	20.4571	3.98301
	Durusu	4.78295	1.61268	0.501628	28.6091	0.000271761	9.14323	8.18403	0.893567	1.5326	10.5286	0.077088	0.413947
	Efes-98	7.23386	7.18427	2.27164	6.83377	12.3119	3.85491	6.20009	3.16365	2.08571	21.671	0.412341	0.24066
	Erciyes	7.33354	1.67763	7.08996	0.0132187	8.80302	1.07737	3.35501	2.6436	6.28735	2.37277	14.0303	0.186984
	Harrington	15.0356	3.77986	13.6449	41.9482	3.89963	8.74603	0.508674	0.87566	0.510994	0.00722181	2.23026	1.35579
	Ince-04	0.548584	19.514	14.2346	5.71224	0.744037	0.933328	20.6485	0.462621	0.0340731	3.09862	9.26033	17.1377
	Kalayci-97	6.76343	0.574723	1.12058	0.0115827	0.0804046	28.8601	2.77566	18.6588	9.3619	0.00740037	0.0489181	11.5939
	Ozdemir-05	3.1857	0.281498	12.2998	4.43496	3.2134	0.018755	3.32862	0.184147	9.16152	1.10001	10.3031	14.5976
	Sladoran	6.84926	1.2402	22.4282	0.000168098	17.822	7.88312	16.342	8.25581	0.80789	1.69794	0.179371	8.44235
	Tokak 157/37	6.88036	0.621129	4.86184	4.9394	0.0946553	2.74735	0.0992986	3.03216	6.20352	18.1046	37.9434	1.91237
	Yildiz	5.33036	8.98042	2.56853	0.00879676	21.4446	1.1401	20.0745	0.000477098	23.8973	3.89601	0.350767	4.8452
	Zeynelaga	0.286347	24.8461	4.02709	0.0679801	2.26806	9.94772	1.33252	33.7591	0.177754	0.528426	0.11261	15.4222
	Squared cosines of the observations:
		F1	F2	F3	F4	F5	F6	F7	F8	F9	F10	F11	F12
	Aydanhanim	0.312859	0.570592	0.00689623	0.0199268	0.0742908	0.000615131	0.00619048	0.00823901	0.000179766	0.000143888	5.70657e-05	1.04594e-05
	Basgul	0.861059	0.0102881	0.0748166	0.0170149	0.00927911	0.00254841	0.00257515	0.00417671	0.0146385	0.00332467	0.00017476	0.000104572
	Bolayir	0.736504	6.25604e-06	0.165453	0.000153582	0.0294808	0.0529704	0.00425904	0.00524393	0.00400172	0.00174535	0.000101728	7.98874e-05
	Catalhoyuk	0.811497	0.0886372	0.014317	0.0365817	0.00276635	0.0124508	0.0103934	0.0109566	0.0096955	0.000501916	0.00215258	5.01643e-05
	Durusu	0.454359	0.0849524	0.0106833	0.399874	2.23297e-06	0.029623	0.0161425	0.00135433	0.00114604	0.00185062	7.66654e-06	4.92749e-06
	Efes-98	0.510682	0.281247	0.0359533	0.0709832	0.0751792	0.00928157	0.00908819	0.00356338	0.00115905	0.00283075	3.04752e-05	2.12893e-06
	Erciyes	0.676907	0.0858691	0.146716	0.000179523	0.0702812	0.00339161	0.00642996	0.00389319	0.00456825	0.000405242	0.00135578	2.16271e-06
	Harrington	0.556268	0.0775468	0.113175	0.228345	0.012479	0.0110357	0.000390753	0.000516883	0.000148815	4.9437e-07	8.6383e-05	6.28538e-06
	Ince-04	0.0343906	0.678372	0.20006	0.0526888	0.00403444	0.00199553	0.0268772	0.000462717	1.68142e-05	0.000359424	0.000607761	0.000134625
	Kalayci-97	0.772359	0.0363945	0.0286889	0.000194616	0.000794192	0.112403	0.00658139	0.0339962	0.00841556	1.56368e-06	5.84832e-06	0.000165905
	Ozdemir-05	0.44312	0.0217129	0.38356	0.0907656	0.0386611	8.89733e-05	0.00961347	0.000408672	0.0100312	0.00028311	0.00150036	0.000254435
	Sladoran	0.461	0.0462888	0.338432	1.6647e-06	0.103754	0.018096	0.0228383	0.00886565	0.000428032	0.000211457	1.26392e-05	7.1203e-05
	Tokak 157/37	0.73854	0.0369717	0.116999	0.0780105	0.00087882	0.0100578	0.000221312	0.00519288	0.00524165	0.0035958	0.00426392	2.57224e-05
	Yildiz	0.397958	0.371794	0.0429917	9.66316e-05	0.138482	0.00290302	0.0311189	5.68306e-07	0.0140442	0.000538201	2.74164e-05	4.53284e-05
	Zeynelaga	0.017804	0.856661	0.0561353	0.000621903	0.0121975	0.0210948	0.00172028	0.0334896	8.69982e-05	6.07928e-05	7.33016e-06	0.000120157
	Values in bold correspond for each observation to the factor for which the squared cosine is the largest

## Sheet: Sayfa1
	Figure 5: Principal component analysis in fall (a) and spring plantings (b). AA: alpha amylase activities, DP: diastatic power, GY: grain yield, LOD: lodging, , ME: malt extract, NGPS: number of grains per spikes, NSPS: number of spikes per square meter, PH: plant height, TH: time to heading, TM: time to maturity, TSW: thousand-seed weight, TW: test weight.
