# Supplementary material for: Barley yield and malt quality affected by fall and spring planting under rainfed conditions
Source: PeerJ. 2023 Aug 14;11:e15802. doi: 10.7717/peerj.15802 (PMC10434083; doi:10.7717/peerj.15802)
Supplement: Tables S3–S6 [file peerj-11-15802-s001.xlsx]

## Sheet: 2016F
	Cultivars	Replication	HT	MAT	PH	LOD	NGPS	NSPSM	TSW	HW	GY	AA	DP	ME
Aydanhanım	1	1	190	94	233	20	31.7	384.8	6.57	53.9	66.3	118.9	435.8	80
Başgül	2	1	176	94	229	90	21.8	469.1	5.17	50.5	62.6	43.7	147.8	77.2
Bolayır	3	1	173	66	223	0	20.5	575.9	5.6	47.5	64.4	82.1	387.4	79.1
Çatalhöyük	4	1	180	90	223	100	22.7	479.6	5.25	48.3	60.4	78	147.8	78.5
Çumra-2001	5	1	184	93	233	0	28.2	371.1	5.89	56.4	68.6	44.8	296.6	76.3
Durusu	6	1	180	80	230	0	26.3	410	6.28	58.2	64.9	97	309.5	80.7
Efes-98	7	1	178	92	223	100	23.1	491.5	5.62	49.6	61.3	81.3	129.3	71.4
Erciyes	8	1	177	92	223	100	21.8	464.8	5	49.2	59.8	40.4	172.2	77.1
Harrington	9	1	180	77	230	10	26.6	538.4	6.06	42.3	62.1	127.3	583.3	82.4
Ince-04	10	1	179	83	229	20	20.9	531	6.13	55.1	67.3	82.2	494.5	81
Kalaycı-97	11	1	178	80	226	90	21.8	479.3	5.34	51	63.1	82.8	150.2	75.7
Özdemir-05	12	1	176	84	227	100	21.1	582.7	5.28	43	61.3	56	182.3	76.4
Sladoran	13	1	176	66	230	0	24	474.7	5.45	47.8	64.4	124.3	381	78.3
Tokak 157/37	14	1	179	92	225	100	21	386	4.77	58.7	65.6	51.6	141.2	74.2
Yıldız	15	1	174	78	230	0	24.3	399	5.14	53	63.8	167	405.1	81.7
Zeynelağa	16	1	174	70	231	0	23.2	497.2	5.68	49.2	64.2	118.8	548.8	79.6
Aydanhanım	1	2	188	93	231	10	29.1	442.6	7.02	54.6	67.8	122	437.5	79.1
Başgül	2	2	176	94	227	90	21.4	522	5.61	50.2	61.5	37.8	164.4	76.7
Bolayır	3	2	175	66	222	0	21.5	533.8	5.4	47.1	65	81	388.8	80.6
Çatalhöyük	4	2	180	96	223	100	22.9	434.8	4.71	47.2	60.2	41.9	166.4	78.1
Çumra-2001	5	2	184	90	233	0	30.2	378.2	6.35	55.7	67.3	31.2	291.1	77
Durusu	6	2	180	84	230	0	24.8	455.2	6.54	58	64.4	107.3	362	81.3
Efes-98	7	2	177	90	223	100	22.5	504.1	5.71	50.4	61.6	17.9	103.4	71.6
Erciyes	8	2	178	86	223	100	22.9	458.3	5.14	48.9	59.9	72.9	215.9	78
Harrington	9	2	181	73	226	10	26	514.7	5.69	42.5	63.1	136.7	600	82
Ince-04	10	2	176	92	228	20	23.5	561.3	6.79	51.4	66.8	85.4	413.5	80.8
Kalaycı-97	11	2	180	84	223	100	21.8	475.4	5.26	50.6	62.7	62.5	190	73.3
Özdemir-05	12	2	176	83	225	100	21.3	556.9	5.22	43.9	60.2	25.1	189.5	73.3
Sladoran	13	2	176	68	230	0	23.5	482.4	5.6	49.4	64	136	369.1	78.3
Tokak 157/37	14	2	179	96	225	95	22	361	4.79	58.4	62.8	46.8	144.2	74.3
Yıldız	15	2	174	80	230	0	22.6	490.8	6.05	54.5	64.6	145.7	393.1	81.4
Zeynelağa	16	2	174	71	230	0	21.1	569.4	5.91	49.2	65.2	102.9	522.6	78.6
Aydanhanım	1	3	185	96	231	20	29.4	453.7	7.05	52.9	66	114.8	436	80.4
Başgül	2	3	178	93	227	100	20.8	532.6	5.42	49	61.5	36.1	118.5	77.6
Bolayır	3	3	175	70	228	0	20	620	5.81	46.9	63.9	92	388	80.4
Çatalhöyük	4	3	177	94	223	100	22.5	532.7	5.47	45.7	59.5	32	155	77.7
Çumra-2001	5	3	186	101	231	6	30.2	370.5	6.17	55.2	66.7	55.4	346.5	75.5
Durusu	6	3	179	82	230	0	24.9	440.6	6.25	56.9	64.9	81.4	406.3	80.1
Efes-98	7	3	178	96	223	100	22.6	487.7	5.46	49.5	61.8	40.7	118.7	73.6
Erciyes	8	3	177	93	229	100	23.8	456.3	5.21	47.9	59.1	55.2	222.7	76.9
Harrington	9	3	179	77	226	10	26.6	560.1	6.22	41.8	63.3	108	650	81.6
Ince-04	10	3	177	95	227	40	23.8	506.2	6.36	52.7	66	70.5	394.3	81.3
Kalaycı-97	11	3	179	88	223	100	22.9	513.4	5.81	49.4	62.2	78.4	191.8	74
Özdemir-05	12	3	177	91	223	100	20.6	640.7	5.71	43.2	60.9	49.9	200.2	75.1
Sladoran	13	3	175	69	233	0	23.5	524.6	5.8	47	64.6	140.9	370.4	78.6
Tokak 157/37	14	3	179	94	225	100	22	341	4.74	61	64	49.3	144	75.9
Yıldız	15	3	175	84	233	0	26.6	399.1	5.64	53.1	64.9	148.6	382.4	82
Zeynelağa	16	3	173	75	230	0	21.1	577.3	6.1	50.1	66.6	103.8	544.6	78.8
Aydanhanım	1	4	186	94	232	17	31	412.7	6.88	53.8	66.7	118.6	436.4	79.8
Başgül	2	4	177	93	228	93	21.3	507.3	5.4	49.9	61.9	39.2	143.6	77.2
Bolayır	3	4	174	67	224	0	22	540.3	5.6	47.1	64.4	85	388.1	80.9
Çatalhöyük	4	4	179	93	223	100	22.7	481.5	5.14	47.1	60	50.6	156.4	78.1
Çumra-2001	5	4	185	95	232	2	29.5	373.2	6.14	55.8	67.5	43.8	311.4	76.3
Durusu	6	4	180	82	230	0	25.3	434.8	6.36	57.7	64.8	95.2	359.3	80.7
Efes-98	7	4	178	93	223	100	22.7	494.4	5.6	49.8	61.6	46.6	117.2	72.2
Erciyes	8	4	177	90	225	100	22.9	459.5	5.12	48.7	59.6	56.2	203.6	77.3
Harrington	9	4	181	76	227	10	26.4	537.7	5.99	42.2	62.8	124	611.1	82.9
Ince-04	10	4	177	90	228	27	22.8	531.7	6.42	53.1	66.7	79.3	434.1	82.2
Kalaycı-97	11	4	179	84	224	97	22.2	489.4	5.47	50.3	62.7	74.5	177.3	74.4
Özdemir-05	12	4	176	86	225	100	21	592.8	5.4	43.4	60.8	43.7	190.6	74.9
Sladoran	13	4	177	68	230	0	23.7	493.4	5.62	48.1	64.3	133.7	373.5	78.4
Tokak 157/37	14	4	180	93	225	100	22	378	4.67	59.1	62.6	49.3	144.7	74.1
Yıldız	15	4	175	81	231	0	24.5	427.5	5.61	53.5	64.5	153.8	393.6	81.7
Zeynelağa	16	4	174	72	230	0	21.8	546.3	5.9	49.5	65.3	108.5	538.7	79

## Sheet: 2016S
	Cultivars	Replication	HT	MAT	PH	LOD	NGPS	NSPSM	TSW	HW	GY	AA	DP	ME
Aydanhanım	1	1	82	100	116	0	27.8	313.1	4.52	51.9	62.1	71.1	313.7	73
Başgül	2	1	65	93	114	100	21.1	457.3	4.99	51.7	63.8	41.5	124	75.9
Bolayır	3	1	78	79	111	0	25.1	464.4	5.06	43.4	60.8	114.5	474.3	80.1
Çatalhöyük	4	1	67	91	105	100	21.4	386.2	4.26	51.6	62.5	71.6	143.6	73.7
Durusu	5	1	79	90	115	0	24.6	461.4	5.86	51.6	62.8	90.2	348.8	77.9
Efes-98	6	1	67	91	108	100	20.9	284.4	3.14	52.7	64	48.1	190.4	74.5
Erciyes	7	1	66	87	108	100	21.5	503.7	5.44	50.2	62.6	84.9	114.5	73.3
Harrington	8	1	67	93	115	0	26.9	521.4	5.86	41.7	63.5	184.2	446.3	81.6
Ince-04	9	1	67	90	114	10	22.9	508.2	6.17	53	66.7	95.9	297.5	82.3
Kalaycı-97	10	1	67	92	107	100	21.7	395.8	4.5	52.5	62.8	48.4	155.8	72.5
Özdemir-05	11	1	64	83	109	100	19.7	503.7	4.53	45.7	62.2	43.8	215.8	76
Sladoran	12	1	79	78	115	0	24.3	405.4	4.56	46.3	62.4	86.7	268.9	78.8
Tokak 157/37	13	1	66	90	109	80	20.8	393.7	4.44	54.2	62	66.8	123	73.5
Yıldız	14	1	66	88	115	0	27.5	322.8	4.54	51.1	61.5	101.3	311.5	81
Zeynelağa	15	1	64	75	116	0	19.7	619.4	5.74	47	64.3	54.3	270.2	77
Aydanhanım	1	2	83	99	116	10	30.2	292.3	4.53	51.4	61.8	61.4	330.2	74.2
Başgül	2	2	66	93	112	100	22.2	479.1	5.45	51.4	62.6	47.1	131.5	74.7
Bolayır	3	2	80	78	112	0	24.6	547	5.92	44	60.5	97.1	449.7	79.9
Çatalhöyük	4	2	66	97	106	100	22.4	375.5	4.25	50.6	61.6	68.3	189.6	74.9
Durusu	5	2	78	88	115	0	24.2	473.7	5.96	52.1	62.9	91.4	344.6	78.4
Efes-98	6	2	65	97	108	100	23.1	281.4	3.35	51.5	63	40.7	137.3	74.3
Erciyes	7	2	66	90	108	100	19.4	577.7	5.53	49.4	62.2	58.6	122.7	75.6
Harrington	8	2	69	94	115	0	28.2	465.6	5.22	39.7	62.7	203.6	453.8	82
Ince-04	9	2	67	93	113	10	23.8	497.5	6.1	51.4	66.4	84.3	200.9	81.8
Kalaycı-97	10	2	69	92	108	100	22.9	404.7	4.74	51.1	62.6	64.3	189	71.7
Özdemir-05	11	2	65	85	110	100	22.8	478.9	4.9	44.9	63.1	65.5	187.3	74
Sladoran	12	2	79	76	115	0	23.2	377.7	4.16	47.4	63.4	114.8	310.8	78.8
Tokak 157/37	13	2	66	90	110	90	22	393.8	4.47	51.6	64.4	84.3	138	74.1
Yıldız	14	2	68	87	115	0	27.1	314.9	4.15	48.6	60.3	85.2	278	79.9
Zeynelağa	15	2	66	71	115	0	20	646.8	5.95	46	63.7	82.9	281.4	77.7
Aydanhanım	1	3	83	98	116	10	30.5	227.3	3.51	50.6	61.9	68.5	332	78.6
Başgül	2	3	64	97	112	100	23.1	386	4.55	51.1	61.6	39.9	126.3	75.7
Bolayır	3	3	77	82	112	0	26.6	472.7	5.52	43.9	59.8	113.5	433	79.2
Çatalhöyük	4	3	66	95	106	100	21.1	388.1	4.17	50.9	61.1	71.7	187.7	74.4
Durusu	5	3	77	93	115	0	27.2	448.3	6.4	52.4	63.3	93.2	369.7	79.7
Efes-98	6	3	66	94	108	100	21.8	298.8	3.15	48.2	61.9	52.3	229.2	75.6
Erciyes	7	3	65	88	108	100	22.9	476.4	5.4	49.4	62.1	44.2	205.2	74
Harrington	8	3	68	93	114	0	27	507.7	5.38	39.2	62.7	184.8	387.3	82
Ince-04	9	3	67	89	112	20	20.6	590.7	6.3	51.7	65.2	91.8	389.1	81
Kalaycı-97	10	3	68	91	108	100	20.3	428.6	4.44	51	62.3	55.2	139.6	72.9
Özdemir-05	11	3	65	85	109	100	20.6	450	4.06	43.8	61.8	33.2	210.3	75.2
Sladoran	12	3	78	77	117	5	22.6	441.2	4.65	46.6	63.7	96.5	342.8	79.4
Tokak 157/37	13	3	66	94	110	100	20.5	355.8	4.01	54.9	62.6	59.9	140	73
Yıldız	14	3	71	86	116	0	27.4	343.5	4.67	49.6	59.7	115.1	363.7	81
Zeynelağa	15	3	65	76	115	0	21.8	567.5	5.54	44.7	62.4	64.6	293.8	76.4
Aydanhanım	1	4	83	99	116	5	29.5	276.7	4.19	51.3	61.9	67	325.3	75.3
Başgül	2	4	65	94	113	100	22.1	439.9	5	51.4	62.7	42.9	127.3	75.4
Bolayır	3	4	78	80	112	0	25.4	494.1	5.5	43.8	60.4	108.4	452.3	79.7
Çatalhöyük	4	4	66	94	106	100	21.6	383.1	4.23	51	61.7	70.5	173.6	74.3
Durusu	5	4	78	91	115	0	25.3	460.7	6.07	52	63	91.6	354.4	78.7
Efes-98	6	4	66	94	108	100	21.9	287.8	3.21	50.8	63	47	185.6	74.8
Erciyes	7	4	66	88	108	100	21.3	516.3	5.46	49.7	62.3	62.6	147.5	74.3
Harrington	8	4	68	93	115	0	27.4	498	5.48	40.2	63	190.9	429.1	81.9
Ince-04	9	4	67	91	113	15	22.5	529.5	6.19	52	66.1	90.6	295.8	81.7
Kalaycı-97	10	4	68	91	108	100	21.6	409.1	4.56	51.5	62.6	55.9	161.4	72.4
Özdemir-05	11	4	65	84	109	100	21	477.5	4.5	44.8	62.4	47.5	204.5	75.1
Sladoran	12	4	79	77	116	0	23.4	407.5	4.46	46.8	63.2	99.3	307.5	79
Tokak 157/37	13	4	66	91	110	90	21.1	380.8	4.31	53.6	63	70.3	133.7	73.5
Yıldız	14	4	68	87	115	0	27.3	327.2	4.45	49.8	60.5	100.5	317.7	80.7
Zeynelağa	15	4	65	74	115	0	20.5	609.8	5.75	45.9	63.5	67.3	281.8	77

## Sheet: 2017F
	Cultivars	Replication	HT	MAT	PH	LOD	NGPS	NSPSM	TSW	HW	GY	AA	DP	ME
Aydanhanım	1	1	171	121	210	75	30	389.3	5.09	43.6	62	92	363.5	79.4
Başgül	2	1	164	109	189	100	27.9	350	3.88	39.8	59	67.1	95.3	75.3
Bolayır	3	1	158	111	206	50	28.1	387.9	4.48	41	63	100.1	372	79
Çatalhöyük	4	1	165	112	192	100	26.9	348.6	3.43	36.6	57.7	50.1	104.3	71.1
Çumra-2001	5	1	166	111	212	40	33.1	374.3	5.22	42.2	61.4	59.2	218.3	79.7
Durusu	6	1	163	106	210	60	28.3	440.3	5.97	47.9	64.4	112.6	344.5	80.1
Efes-98	7	1	166	111	190	100	24.6	332.1	3.02	37	58.4	55.9	87.5	75.2
Erciyes	8	1	164	103	192	100	25.7	407.9	3.65	34.8	57.6	41.4	56.9	70.1
Harrington	9	1	165	96	198	50	26	490.1	4.54	35.6	60	114	300.6	82.1
Ince-04	10	1	165	112	200	50	27.1	450.3	4.89	40.1	62.2	48.8	138.7	80.5
Kalaycı-97	11	1	164	109	200	90	25.9	510.7	4.98	37.7	60.2	49	88.6	72.3
Özdemir-05	12	1	164	101	193	100	24.6	431.4	3.74	35.3	62.8	60.1	114.4	71.7
Sladoran	13	1	158	89	210	50	25.6	405.7	4.32	41.6	63.9	102	251	78.5
Tokak 157/37	14	1	163	115	202.2	100	23.5	395.3	3.55	38	58	45.2	149	75.6
Yıldız	15	1	161	110	206	20	29.3	385.6	5.14	45.5	68.2	212	214.5	79.5
Zeynelağa	16	1	155	110	189	50	24.4	507.6	5.8	46.8	67.7	67.7	199.6	77.1
Aydanhanım	1	2	170	123	211	60	29	397.9	5.03	43.6	63	104.7	346.2	79.4
Başgül	2	2	164	117	190	100	27.9	343.5	3.92	41	60.8	53.6	104.7	75.8
Bolayır	3	2	156	111	200	45	26.5	373.3	4.06	41	64.8	92	356.5	79.5
Çatalhöyük	4	2	166	114	194	100	26.3	337.8	3.21	36.2	57.1	43	130.9	72.2
Çumra-2001	5	2	166	120	211	45	30.1	386.9	4.94	42.4	61.2	62.4	221.4	75.5
Durusu	6	2	165	109	211	50	25.9	503.8	5.7	43.8	63.5	93	349.2	80.2
Efes-98	7	2	166	118	192	100	24	314.7	2.93	38.8	57.5	46.6	140.6	76
Erciyes	8	2	165	112	193	100	27.5	354.5	3.37	34.6	60.2	33	71.2	69.3
Harrington	9	2	165	97	201	50	26.8	516.5	4.78	34.5	61	110	302.2	81.6
Ince-04	10	2	166	111	201	40	26.3	498.7	5.19	39.6	63.7	44.4	179.2	80.2
Kalaycı-97	11	2	163	107	198	70	25.1	483.3	4.61	38.1	60.7	47.2	54.5	72.4
Özdemir-05	12	2	165	110	192	100	24.5	421.4	3.47	33.6	58.3	58.8	105.9	71.6
Sladoran	13	2	158	88	202	60	26.3	432.9	4.51	39.6	64	112	265	79
Tokak 157/37	14	2	162	113	201	100	23.5	398.8	3.48	37.2	59.1	47.6	148	75
Yıldız	15	2	160	110	205	40	27.6	449.4	5.66	45.6	66.6	221.2	218.6	79.2
Zeynelağa	16	2	155	108	190	40	24.8	448.1	5.09	45.8	67.2	36.2	171.6	79.5
Aydanhanım	1	3	170	123	210	80	31.5	354.7	4.83	43.3	64	96	342.3	80.9
Başgül	2	3	166	119	189	100	25.6	354.7	3.58	39.4	58.9	45.6	101.5	75.2
Bolayır	3	3	159	113	206	55	26.5	382	3.95	39	65.5	82	382.9	80
Çatalhöyük	4	3	166	111	192	100	25.1	380.9	3.45	36.1	58.3	37.9	147.4	71.5
Çumra-2001	5	3	166	122	211	50	30.5	363.1	4.75	42.8	62.3	65.2	264.1	80.2
Durusu	6	3	166	103	210	30	25.9	523.1	6.07	44.8	64.1	104.9	318.5	80.6
Efes-98	7	3	165	119	193	100	24.8	350.7	3.2	36.8	56	93.2	91.9	77.3
Erciyes	8	3	166	112	192	100	25	432.8	3.79	35	57.7	24.7	68.3	71.1
Harrington	9	3	164	98	199	40	27.6	453.6	4.31	34.5	60.5	106	321.7	82
Ince-04	10	3	166	114	200	45	24.3	566.7	5.46	39.7	63.4	48.9	140.5	79.1
Kalaycı-97	11	3	164	113	200	100	24.4	542.7	4.76	35.9	60	52.7	91.6	73.8
Özdemir-05	12	3	165	109	194	100	23.2	452.7	3.37	32.1	57.7	108.2	154.5	71.9
Sladoran	13	3	157	87	208	35	24.7	485	4.79	40	63.7	126	299	77.1
Tokak 157/37	14	3	162	112	202	100	23.7	401.2	3.62	36.8	59	46.8	144.8	75.6
Yıldız	15	3	162	118	200.2	30	27.1	466.3	5.5	43.6	66.1	197.6	199.4	80.7
Zeynelağa	16	3	155	107	189	10	24.1	456.9	5.07	45.9	67.1	87.6	190.3	80.2
Aydanhanım	1	4	173	121	212	70	31.5	385.1	5.09	42	63.9	104.2	342.4	80.8
Başgül	2	4	165	114	190	90	26.5	330.5	3.49	39.7	61.1	53.4	72.1	75.6
Bolayır	3	4	157	113	200	20	25.1	419.8	4.1	38.9	64.2	98	377	80.8
Çatalhöyük	4	4	166	116	192	100	24.7	371.6	3.39	36.9	57.9	40.8	101.4	71.8
Çumra-2001	5	4	166	107	212	40	29.5	369.6	4.87	44.7	61.6	53.2	232.8	78.6
Durusu	6	4	164	98	211	30	23.6	522	5.44	44.1	63.5	73.3	269.4	81.3
Efes-98	7	4	166	116	191	100	25.1	313.5	2.96	37.7	57.5	38.9	103.3	77.6
Erciyes	8	4	166	111	193	100	25.7	362	3.27	35.1	60.2	31.2	51.1	71.3
Harrington	9	4	163	98	201	50	25.6	443.4	4.09	36	61.5	100	299.1	81.6
Ince-04	10	4	166	105	201	50	23.6	483.8	4.86	42.6	64.3	76.9	170.9	80.3
Kalaycı-97	11	4	164	108	201	50	24.8	502.8	4.61	36.9	60.3	46.2	77.2	74.3
Özdemir-05	12	4	164	103	194	90	23.3	411.4	3.29	34.2	59.2	40.8	114.5	71.7
Sladoran	13	4	159	88	202	50	24.5	496.1	4.82	39.6	63.2	126	153.5	79
Tokak 157/37	14	4	164	113	199.9	100	24.1	413	3.6	37.3	58	47	152	75.2
Yıldız	15	4	162	103	207	10	26.3	436.9	5	43.6	65.4	218	221.2	78.8
Zeynelağa	16	4	157	102	190	70	23.1	469.5	4.98	46	67.3	30.6	185.7	80

## Sheet: 2017S
	Cultivars	Replication	HT	MAT	PH	LOD	NGPS	NSPSM	TSW	HW	GY	AA	DP	ME
Aydanhanım	1	1	104	85	130	0	28.9	303.1	3.12	35.7	55	82.9	161	73.9
Başgül	2	1	77	99	103	20	20.9	302.7	3.18	50.2	66.2	63.8	50.3	72.8
Bolayır	3	1	100	69	119	0	25.1	347.9	3.61	41.4	61.3	83	144.3	73
Çatalhöyük	4	1	79	88	106	10	21.7	330.7	3.42	47.6	63.1	62.6	82.3	72.4
Durusu	5	1	102	73	123	0	22.5	312.1	3.4	48.5	63.4	119.2	103.2	75.6
Efes-98	6	1	77	86	104	10	24	273.3	2.86	43.6	65.5	74.2	63.9	73
Erciyes	7	1	78	83	106	20	20	358.6	3.14	43.8	67	59.2	35.8	69.4
Harrington	8	1	88	85	113	0	28.1	267.9	3.13	41.5	65.1	177.2	206.7	81.6
Ince-04	9	1	87	88	113	0	22.8	297.3	3.51	51.9	65.1	126.2	255.5	80.2
Kalaycı-97	10	1	83	87	113	10	21.7	304.8	2.85	43	62.9	86.8	40.9	67.5
Özdemir-05	11	1	81	82	107	0	22.9	380	3.76	43.3	63	77.4	52.7	69.9
Sladoran	12	1	106	61	123	0	23.5	337.7	2.83	35.6	62.1	74.8	92.5	74
Tokak 157/37	13	1	84	96	110	40	22.5	295	3.2	49.2	62.3	38.2	143	74.8
Yıldız	14	1	101	75	119	0	24.6	213.6	2.29	43.7	60.4	153	110.3	75
Zeynelağa	15	1	79	78	103	0	21.3	389.3	4.09	49.3	68.4	137.1	260.7	74.4
Aydanhanım	1	2	105	79	129	0	28.5	323.2	3.38	36.6	56.6	69.3	152.2	75.8
Başgül	2	2	78	89	104	20	20.8	284.1	2.97	50.3	66.1	71.8	72.6	73
Bolayır	3	2	101	72	118	0	25	299.6	3.05	40.8	61.6	101.3	156.9	74.6
Çatalhöyük	4	2	80	94	108	90	21.5	302.8	2.9	44.6	62.2	58.6	72	73
Durusu	5	2	103	70	124	0	21.1	296.3	3.06	49	63.6	113.8	145.4	74.9
Efes-98	6	2	78	91	106	10	23.7	253.3	2.63	43.8	60.5	57.9	75.7	71.8
Erciyes	7	2	79	89	107	10	19.1	340.4	2.9	44.7	60.6	45.4	51.8	69.4
Harrington	8	2	88	80	114	0	27.6	280.2	3.39	43.9	61.4	221.6	270.9	80.7
Ince-04	9	2	86	92	114	0	21.7	335.9	3.64	49.9	64.8	141.8	260.7	80
Kalaycı-97	10	2	83	85	111	10	20.9	313.1	2.98	45.4	63.3	85.2	48.2	68.4
Özdemir-05	11	2	81	79	106	0	22.9	362.2	3.54	42.6	62.1	65.1	90.5	71
Sladoran	12	2	106	69	121	0	24.5	317.4	2.88	36.9	61.8	105.2	150.7	74.2
Tokak 157/37	13	2	85	95	111	30	22.8	288.8	3.53	50.1	63	46.6	142.4	73.9
Yıldız	14	2	102	72	120	0	23.9	215.1	2.17	42.3	60.4	107.2	147.6	75.2
Zeynelağa	15	2	79	82	104	0	21.1	326.8	3.4	49.3	66.6	160.5	343.3	76.9
Aydanhanım	1	3	105	84	129	0	29.7	295.3	3.05	34.7	55.2	91	119.1	73.5
Başgül	2	3	77	98	103	20	22.1	276	3.09	50.6	66	85.2	39.3	72.2
Bolayır	3	3	100	72	119	0	24.3	279.9	2.82	41.5	60.2	74.8	140.2	73.9
Çatalhöyük	4	3	78	92	106	20	21.5	312.7	3.12	46.4	62.1	81.8	79.8	71.7
Durusu	5	3	105	80	123	0	24	288.6	3.34	48.2	62.6	167.4	123.7	74.4
Efes-98	6	3	77	93	107	20	23.1	297.6	3.03	44.2	61.4	93.8	92.2	72.6
Erciyes	7	3	80	77	106	10	20.5	347.8	3.19	44.7	62.3	91.6	52.2	70.1
Harrington	8	3	87	78	113	0	25.9	292.8	3.28	43.3	68.6	212.4	196.5	80.1
Ince-04	9	3	85	85	113	0	21.9	283.9	3.1	49.9	65.7	162	249.7	78
Kalaycı-97	10	3	83	88	113	10	20.7	294.6	2.75	45.1	68.6	122.6	32.7	69.8
Özdemir-05	11	3	80	86	108	0	21.1	326.3	2.86	41.7	65.1	98.4	47.5	71
Sladoran	12	3	107	66	121	0	22	318.2	2.46	35.1	62.2	93.8	138.4	72.9
Tokak 157/37	13	3	84	95	110	40	22.3	290.8	3.01	51.4	63.1	44.6	144	75.2
Yıldız	14	3	101	72	119	0	25.7	204.1	2.39	45.4	61	149.4	117	75.2
Zeynelağa	15	3	80	78	103	0	22.4	277.4	3.07	49.5	65.7	145.2	276.7	74.7
Aydanhanım	1	4	105	80	129	0	28.6	290.3	2.96	35.7	56	85.2	101.9	75.4
Başgül	2	4	78	90	104	20	22.9	285.2	3.31	50.6	61.1	99	47.4	73.1
Bolayır	3	4	103	71	121	0	25.3	318.3	3.41	42.3	62.1	86	148.8	75.5
Çatalhöyük	4	4	79	90	106	20	23.2	272.9	2.77	43.7	61.1	73.6	63.5	72
Durusu	5	4	105	68	124	0	22.6	287.2	3.13	48.3	62.8	133	126.8	76
Efes-98	6	4	78	91	105	10	22.1	280.8	2.77	44.5	61.7	68.2	70.6	72
Erciyes	7	4	79	88	107	20	20.9	353.5	3.36	45.3	65.5	71.8	46.1	68.8
Harrington	8	4	88	80	114	0	30.3	248.8	3.23	42.9	58.2	193	216.7	80.3
Ince-04	9	4	85	88	114	0	21.9	305.3	3.42	51.2	65.5	99	256	78.4
Kalaycı-97	10	4	83	85	114	10	21.5	304.2	2.88	44.1	62.4	105.2	45.2	66.7
Özdemir-05	11	4	82	82	108	0	23.5	386.5	3.99	44	64	73.6	44.6	69.4
Sladoran	12	4	107	65	120	0	23.6	345.3	2.93	36	61	89.8	135.1	73.6
Tokak 157/37	13	4	84	96	111	30	22.1	291.6	3.43	50.8	61.4	43.6	143	75.2
Yıldız	14	4	102	74	120	0	24.6	198.4	2.17	44.6	61.6	113.8	135.5	74.1
Zeynelağa	15	4	79	79	104	0	22.9	332.4	3.77	49.6	67	138.5	324.6	75.8
